# Supplementary material for: Metal-free electrochemical C3-sulfonylation of imidazo[1,2-a]pyridines
Source: Royal Society of Chemistry journal article supplement (doi:10.1039/d1qo00348h), 2021-01-01

**Supporting Information**

**Metal-Free Electrochemical C3-Sulfonylation of  
Imidazo[1, 2-a]pyridines**

Jingyun Zhu,<sup>‡a</sup> Ziyue Chen,<sup>‡a</sup> Meng He,<sup>b</sup> Daoxin Wang,<sup>a</sup> Liangsen Li,<sup>a</sup> Junchao Qi,<sup>a</sup> Renyi  
Shi<sup>†c</sup> and Aiwen Lei<sup>†ab</sup>

<sup>a</sup> National Research Center for Carbohydrate Synthesis, Jiangxi Normal University,  
Nanchang 330022, P. R. China. E-mail: [aiwenlei@whu.edu.cn](mailto:aiwenlei@whu.edu.cn).

<sup>b</sup> College of Chemistry and Molecular Sciences, Institute for Advanced Studies (IAS),  
Wuhan University, Wuhan 430072, P. R. China.

<sup>c</sup> School of Chemical Engineering and Technology, Xi'an Jiaotong University,  
Xi'an 710049, P. R. China. E-mail: [renyi.shi@xjtu.edu.cn](mailto:renyi.shi@xjtu.edu.cn)

<sup>‡</sup>Jingyun Zhu and Ziyue Chen contributed equally to this work.

# Table of contents

**General information .....S2**

**Experimental procedure ..... S3-S4**

**Detailed descriptions for products ..... S5-S13**

**References .....S14**

**Copies of  $^1\text{H}$  NMR,  $^{13}\text{C}$  NMR and  $^{19}\text{F}$  NMR Spectra ..... S15-S39**

## General information

Unless otherwise noted, materials were obtained from commercial suppliers and used without further purification. The instrument for electrolysis is dual display potentiostat (DJS-292B) (made in China). The anodic electrode was graphite rod ( $\phi$  6 mm) and cathodic electrode was Stainless steel (15 mm $\times$ 15 mm $\times$ 0.3 mm). Thin layer chromatography (TLC) employed glass 0.25 mm silica gel plates. Flash chromatography columns were packed with 300-400 mesh silica gel in petroleum (boiling point is between 60-90 °C). Gradient flash chromatography was conducted eluting with a continuous gradient from petroleum to the indicated solvent, and they are listed as volume/volume ratios. NMR spectra were recorded on a Bruker spectrometer at 400 MHz ( $^1\text{H}$  NMR), 101 MHz ( $^{13}\text{C}$  NMR), 376 MHz ( $^{19}\text{F}$  NMR). All chemical shifts are reported relative to tetramethylsilane and solvent peaks. And all  $^1\text{H}$ ,  $^{13}\text{C}$  and  $^{19}\text{F}$  NMR data spectra were reported in delta ( $\delta$ ) units, parts per million (ppm) downfield from the internal standard. Coupling constants are reported in Hertz (Hz). High resolution mass spectra (HRMS) were measured with a Bruker UltiMate 3000 & Compact, accurate masses are reported for the molecular ion + hydrogen ( $[\text{M}+\text{H}]^+$ ) or sodium ( $[\text{M}+\text{Na}]^+$ ).

## Experimental procedure

### General procedure for electrocatalytic synthesis of sulfone

In an undivided three-necked bottle (25 mL) equipped with a stir bar, 2-phenylimidazo[1,2-a]pyridine (**1a**, 0.5 mmol), sodium 4-methylbenzenesulfinate (**2a**, 3 mmol), and  ${}^n\text{Bu}_4\text{NBF}_4$  (0.1 mmol) were combined and added. The bottle was equipped with graphite rod as the anode and Stainless steel as the cathode and was then charged with nitrogen. Under the protection of  $\text{N}_2$ , MeCN (10 mL) and  $\text{H}_2\text{O}$  (1 mL) were injected respectively into the tubes via syringes. The reaction mixture was stirred and electrolyzed at a constant current of 10 mA at room temperature for 4.3 h. When the reaction was finished, the pure product was obtained by flash column chromatography on silicagel.

### Procedure for gram-scale synthesis of sulfone

In an undivided three-necked bottle (100 mL) equipped with a stir bar, 2-phenylimidazo[1,2-a]pyridine (**1a**, 5 mmol), sodium 4-methylbenzenesulfinate (**2a**, 30 mmol), and  ${}^n\text{Bu}_4\text{NBF}_4$  (1 mmol) were combined and added. The bottle was equipped with graphite rod as the anode and Stainless steel as the cathode and was then charged with nitrogen. Under the protection of  $\text{N}_2$ , MeCN (70 mL) and  $\text{H}_2\text{O}$  (7 mL) were injected respectively into the tubes via syringes. The reaction mixture was stirred and electrolyzed at a constant current of 10 mA at room temperature for 37 h. When the reaction was finished, the pure product was obtained by flash column chromatography on silicagel.

### Procedure for cyclic voltammetry (CV)

Cyclic voltammetry was performed in a three-electrode cell connected to a Schlenk line under air at room temperature. The working electrode was a steady glassy carbon disk electrode while the counter electrode was a platinum wire. The reference was an Ag/AgCl electrode submerged in saturated aqueous KCl solution. A mixed solvent (MeCN/H<sub>2</sub>O = 10/1, 11 mL) containing <sup>n</sup>Bu<sub>4</sub>NBF<sub>4</sub> (0.1 mmol) were poured into the electrochemical cell in cyclic voltammetry experiments. The scan rate was 0.10 V/s, ranging from 0.0 V to 2.5 V.

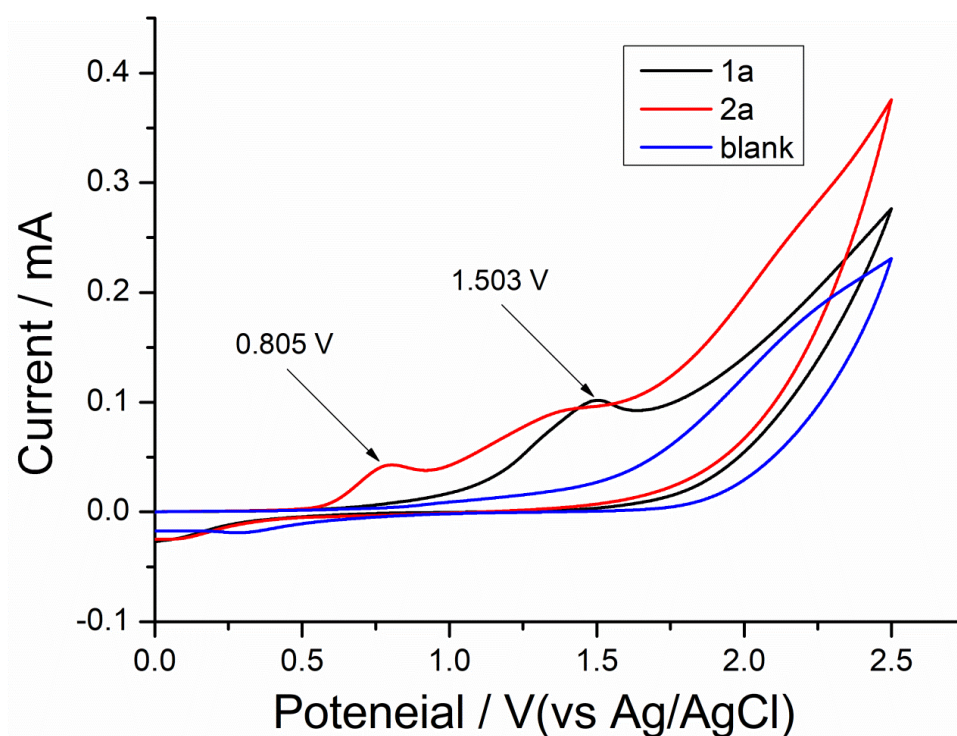

**Figure S1.** Cyclic voltammograms of related compounds (0.1 mmol) in corresponding solvent containing 0.1 mmol <sup>n</sup>Bu<sub>4</sub>NBF<sub>4</sub>.

## Detailed descriptions for products

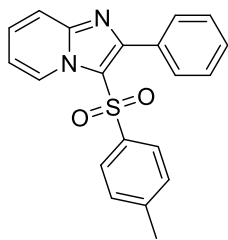

### 2-Phenyl-3-tosylimidazo[1,2-a]pyridine (3a).<sup>1</sup>

White solid was obtained in 92% isolated yield, 159.8 mg. <sup>1</sup>H NMR (400 MHz, CDCl<sub>3</sub>) δ 9.10 (d, *J* = 7.0 Hz, 1H), 7.80–7.73 (m, 2H), 7.70 (d, *J* = 9.0 Hz, 1H), 7.53 (d, *J* = 8.3 Hz, 2H), 7.49–7.38 (m, 4H), 7.13 (d, *J* = 8.1 Hz, 2H), 7.06–7.01 (m, 1H), 2.31 (s, 3H). <sup>13</sup>C NMR (101 MHz, CDCl<sub>3</sub>) δ 152.67, 146.47, 144.29, 138.92, 132.59, 130.41, 129.58, 129.19, 128.36, 127.66, 126.68, 126.27, 117.85, 117.65, 114.47, 21.40.

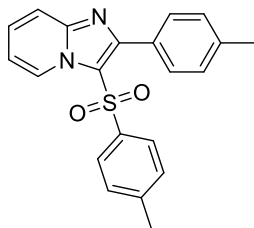

### 2-(p-tolyl)-3-tosylimidazo[1,2-a]pyridine (3b).

White solid was obtained in 93% isolated yield, 168.4 mg. <sup>1</sup>H NMR (400 MHz, CDCl<sub>3</sub>) δ 9.07 (d, *J* = 6.8 Hz, 1H), 7.86–7.62 (m, 3H), 7.54 (d, *J* = 8.4 Hz, 2H), 7.51–7.38 (m, 1H), 7.37–7.23 (m, 2H), 7.15 (d, *J* = 8.0 Hz, 2H), 7.13–6.95 (m, 1H), 2.44 (s, 3H), 2.32 (s, 3H). <sup>13</sup>C NMR (101 MHz, CDCl<sub>3</sub>) δ 152.89, 146.49, 144.24, 139.22, 138.92, 130.32, 129.59, 128.43, 128.34, 126.63, 126.25, 117.77, 117.31, 114.38, 21.44, 21.41. HRMS (ESI) *m/z*: [M+H]<sup>+</sup> Calcd for C<sub>21</sub>H<sub>19</sub>N<sub>2</sub>O<sub>2</sub>S<sup>+</sup>; 363.1162, found 363.1172.

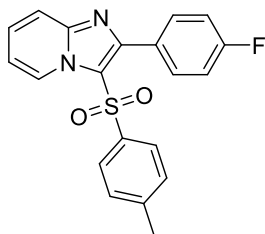

### 2-(4-Fluorophenyl)-3-tosylimidazo[1,2-a]pyridine (3c).

White solid was obtained in 54% isolated yield, 98.0 mg. <sup>1</sup>H NMR (400 MHz, CDCl<sub>3</sub>) δ 9.15–9.11 (m, 1H), 7.76–7.66 (m, 3H), 7.55–7.43 (m, 5H), 7.42–7.34 (m, 1H), 7.15 (d, *J* = 8.0 Hz, 2H), 2.34 (s, 3H).

$^{13}\text{C}$  NMR (101 MHz,  $\text{CDCl}_3$ )  $\delta$  153.88 (d,  $J_{\text{C-F}} = 240.0$  Hz), 153.25 (d,  $J_{\text{C-F}} = 2.5$  Hz), 144.66, 143.96, 138.58, 132.26, 130.34, 129.71, 129.42, 127.81, 126.37, 120.23 (d,  $J_{\text{C-F}} = 25.2$  Hz), 118.29 (d,  $J_{\text{C-F}} = 8.9$  Hz), 114.43, 114.00, 21.52.  $^{19}\text{F}$  NMR (376 MHz,  $\text{CDCl}_3$ )  $\delta$  -135.33. HRMS (ESI)  $m/z$ :  $[\text{M}+\text{H}]^+$  Calcd for  $\text{C}_{20}\text{H}_{16}\text{FN}_2\text{O}_2\text{S}^+$ ; 367.0911, found 367.0905.

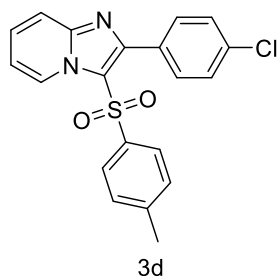

**2-(4-Chlorophenyl)-3-tosylimidazo[1,2-a]pyridine (3d).**

White solid was obtained in 75% NMR quantitative yield.  $^1\text{H}$  NMR (400 MHz,  $\text{CDCl}_3$ )  $\delta$  9.08 (d,  $J = 6.8$  Hz, 1H), 7.80–7.69 (m, 3H), 7.54 (d,  $J = 8.4$  Hz, 2H), 7.48–7.43 (m, 3H), 7.17 (d,  $J = 8.0$  Hz, 2H), 7.10–7.05 (m, 1H), 2.34 (s, 3H).  $^{13}\text{C}$  NMR (101 MHz,  $\text{CDCl}_3$ )  $\delta$  151.32, 146.51, 144.61, 138.73, 135.58, 131.88, 130.98, 129.78, 128.69, 128.05, 126.72, 126.29, 117.93, 117.82, 114.76, 21.52. HRMS (ESI)  $m/z$ :  $[\text{M}+\text{H}]^+$  Calcd for  $\text{C}_{20}\text{H}_{16}\text{ClN}_2\text{O}_2\text{S}^+$ ; 383.0616, found 383.0608.

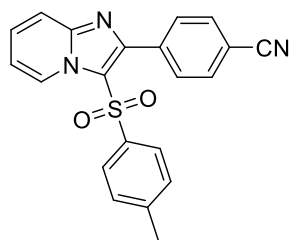

**4-(3-Tosylimidazo[1,2-a]pyridin-2-yl)benzotrile (3e).**

White solid was obtained in 92% isolated yield, 171.6 mg.  $^1\text{H}$  NMR (400 MHz,  $\text{CDCl}_3$ )  $\delta$  9.07 (d,  $J = 7.2$  Hz, 1H), 7.92 (d,  $J = 8.4$  Hz, 2H), 7.85–7.69 (m, 3H), 7.65–7.44 (m, 3H), 7.19 (d,  $J = 8.4$  Hz, 2H), 7.16–7.07 (m, 1H), 2.35 (s, 3H).  $^{13}\text{C}$  NMR (101 MHz,  $\text{CDCl}_3$ )  $\delta$  150.23, 146.66, 144.87, 138.50, 137.24, 131.48, 131.29, 129.89, 128.92, 126.66, 126.27, 118.65, 118.35, 118.14, 115.08, 112.90, 21.50. HRMS (ESI)  $m/z$ :  $[\text{M}+\text{H}]^+$  Calcd for  $\text{C}_{21}\text{H}_{16}\text{N}_3\text{O}_2\text{S}^+$ ; 374.0958, found 374.0965.

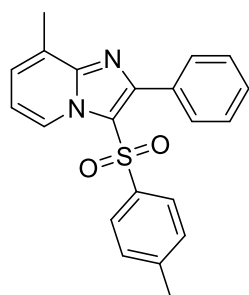

**8-Methyl-2-phenyl-3-tosylimidazo[1,2-a]pyridine (3f).**

White solid was obtained in 87% isolated yield, 157.9 mg.  $^1\text{H}$  NMR (400 MHz,  $\text{CDCl}_3$ )  $\delta$  8.94 (d,  $J$  = 6.8 Hz, 1H), 7.85–7.68 (m, 2H), 7.52 (d,  $J$  = 8.4 Hz, 2H), 7.50–7.39 (m, 3H), 7.21 (d,  $J$  = 7.2 Hz, 1H), 7.12 (d,  $J$  = 8.4 Hz, 2H), 6.93 (t,  $J$  = 7.0 Hz, 1H), 2.62 (s, 3H), 2.30 (s, 3H).  $^{13}\text{C}$  NMR (101 MHz,  $\text{CDCl}_3$ )  $\delta$  152.09, 146.70, 144.15, 138.98, 132.85, 130.47, 129.53, 129.04, 127.93, 127.63, 127.18, 126.27, 124.28, 117.92, 114.48, 21.38, 16.97. HRMS (ESI)  $m/z$ :  $[\text{M}+\text{H}]^+$  Calcd for  $\text{C}_{21}\text{H}_{19}\text{N}_2\text{O}_2\text{S}^+$ ; 363.1162, found 363.1157.

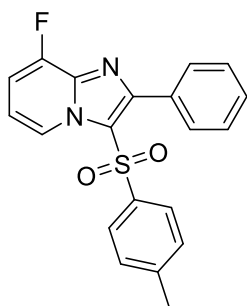

**8-Fluoro-2-phenyl-3-tosylimidazo[1,2-a]pyridine (3g).**

White solid was obtained in 71% isolated yield, 130.6 mg.  $^1\text{H}$  NMR (400 MHz,  $\text{CDCl}_3$ )  $\delta$  8.96 (d,  $J$  = 6.8 Hz, 1H), 8.19–7.68 (m, 2H), 7.60–7.36 (m, 4H), 7.25–7.09 (m, 2H), 7.08–6.91 (m, 1H), 2.34 (s, 3H).  $^{13}\text{C}$  NMR (101 MHz,  $\text{CDCl}_3$ )  $\delta$  152.58, 151.13 (d,  $J_{\text{C-F}}$  = 255.8 Hz), 144.71, 138.49, 132.03, 130.59, 129.71, 129.51, 127.77, 126.47, 123.08 (d,  $J_{\text{C-F}}$  = 5.4 Hz), 119.63, 113.67 (d,  $J_{\text{C-F}}$  = 6.3 Hz), 111.09 (d,  $J_{\text{C-F}}$  = 15.8 Hz), 21.54.  $^{19}\text{F}$  NMR (376 MHz,  $\text{CDCl}_3$ )  $\delta$  -127.72. HRMS (ESI)  $m/z$ :  $[\text{M}+\text{H}]^+$  Calcd for  $\text{C}_{20}\text{H}_{16}\text{FN}_2\text{O}_2\text{S}^+$ ; 367.0911, found 367.0902.

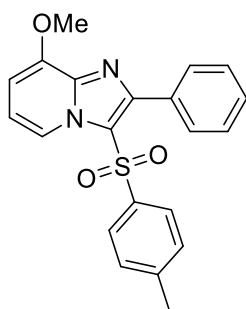

**8-Methoxy-2-phenyl-3-tosylimidazo[1,2-a]pyridine (3h).**

White solid was obtained in 51% NMR quantitative yield.  $^1\text{H}$  NMR (400 MHz,  $\text{DMSO-}d_6$ )  $\delta$  8.54 (d,  $J$  = 6.8 Hz, 1H), 7.71–7.67 (m, 2H), 7.64 (d,  $J$  = 8.4 Hz, 2H), 7.52–7.45 (m, 3H), 7.33 (d,  $J$  = 8.0 Hz, 2H), 7.15 (t,  $J$  = 7.4 Hz, 1H), 7.04 (d,  $J$  = 8.0 Hz, 1H), 3.95 (s, 3H), 2.30 (s, 3H).  $^{13}\text{C}$  NMR (101 MHz,  $\text{DMSO-}d_6$ )  $\delta$  151.15, 148.88, 145.14, 140.84, 138.62, 133.23, 130.76, 130.62, 129.54, 128.09, 126.57,



119.16, 117.92, 116.11, 106.74, 56.68, 21.44. HRMS (ESI)  $m/z$ :  $[M+H]^+$  Calcd for  $C_{21}H_{19}N_2O_3S^+$ ; 379.1111, found 379.1102.

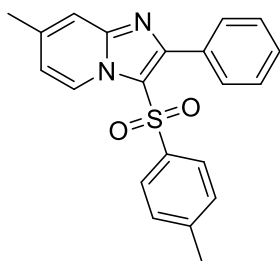

**7-Methyl-2-phenyl-3-tosylimidazo[1,2-a]pyridine (3i).**

White solid was obtained in 93% isolated yield, 168.8 mg.  $^1H$  NMR (400 MHz,  $CDCl_3$ )  $\delta$  8.95 (d,  $J$  = 7.2 Hz, 1H), 7.83–7.68 (m, 2H), 7.51 (d,  $J$  = 8.4 Hz, 2H), 7.48–7.40 (m, 4H), 7.12 (d,  $J$  = 8.4 Hz, 2H), 6.93–6.77 (m, 1H), 2.43 (s, 3H), 2.31 (s, 3H).  $^{13}C$  NMR (101 MHz,  $CDCl_3$ )  $\delta$  152.82, 146.97, 144.13, 139.95, 139.12, 132.69, 130.40, 129.55, 129.14, 127.64, 126.20, 125.80, 117.03, 116.96, 116.36, 21.40, 21.25. HRMS (ESI)  $m/z$ :  $[M+H]^+$  Calcd for  $C_{21}H_{19}N_2O_2S^+$ ; 363.1162, found 363.1167.

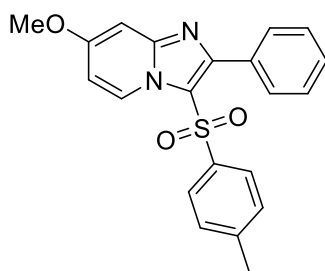

**7-Methoxy-2-phenyl-3-tosylimidazo[1,2-a]pyridine (3j).**

White solid was obtained in 94% isolated yield, 179.2 mg.  $^1H$  NMR (400 MHz,  $CDCl_3$ )  $\delta$  8.90 (d,  $J$  = 7.6 Hz, 1H), 7.88–7.63 (m, 2H), 7.55–7.40 (m, 5H), 7.12 (d,  $J$  = 8.0 Hz, 2H), 6.95 (d,  $J$  = 2.4 Hz, 1H), 6.78–6.64 (m, 1H), 3.86 (s, 3H), 2.31 (s, 3H).  $^{13}C$  NMR (101 MHz,  $CDCl_3$ )  $\delta$  160.13, 152.90, 148.47, 143.96, 139.01, 132.51, 130.21, 129.45, 129.03, 127.50, 126.90, 125.97, 116.18, 108.85, 95.19, 55.60, 21.24. HRMS (ESI)  $m/z$ :  $[M+H]^+$  Calcd for  $C_{21}H_{19}N_2O_3S^+$ ; 379.1111, found 379.1101.

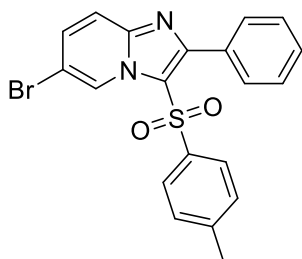

**6-Bromo-2-phenyl-3-tosylimidazo[1,2-a]pyridine (3k).**

White solid was obtained in 43% NMR quantitative yield.  $^1\text{H}$  NMR (400 MHz,  $\text{CDCl}_3$ )  $\delta$  9.31 (d,  $J$  = 0.8 Hz, 1H), 7.84–7.66 (m, 2H), 7.60 (d,  $J$  = 9.6 Hz, 1H), 7.56–7.42 (m, 6H), 7.15 (d,  $J$  = 8.4 Hz, 2H), 2.34 (s, 3H).  $^{13}\text{C}$  NMR (101 MHz,  $\text{CDCl}_3$ )  $\delta$  152.87, 144.85, 144.67, 138.63, 132.14, 131.87, 130.39, 129.71, 129.48, 127.82, 126.86, 126.42, 118.44, 118.35, 109.38, 21.53. HRMS (ESI)  $m/z$ :  $[\text{M}+\text{H}]^+$  Calcd for  $\text{C}_{20}\text{H}_{16}\text{BrN}_2\text{O}_2\text{S}^+$ ; 427.0110, found 427.0115.

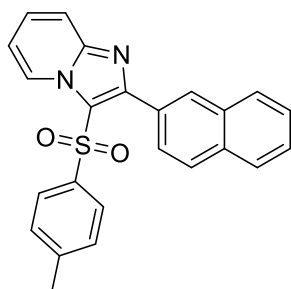

**2-(Naphthalen-2-yl)-3-tosylimidazo[1,2-a]pyridine (3l).**

White solid was obtained in 61% isolated yield, 121.8 mg.  $^1\text{H}$  NMR (400 MHz,  $\text{CDCl}_3$ )  $\delta$  9.15 (d,  $J$  = 7.2 Hz, 1H), 8.27 (s, 1H), 8.02–7.84 (m, 4H), 7.74 (d,  $J$  = 8.8 Hz, 1H), 7.67–7.50 (m, 4H), 7.52–7.41 (m, 1H), 7.22–6.96 (m, 3H), 2.28 (s, 3H).  $^{13}\text{C}$  NMR (101 MHz,  $\text{CDCl}_3$ )  $\delta$  152.63, 146.64, 144.39, 138.97, 133.59, 132.67, 130.46, 130.01, 129.62, 128.67, 128.48, 127.73, 127.67, 127.29, 126.84, 126.74, 126.38, 126.17, 118.00, 117.95, 114.56, 21.44. HRMS (ESI)  $m/z$ :  $[\text{M}+\text{Na}]^+$  Calcd for  $\text{C}_{24}\text{H}_{18}\text{N}_2\text{NaO}_2\text{S}^+$ ; 421.0981, found 421.0976.

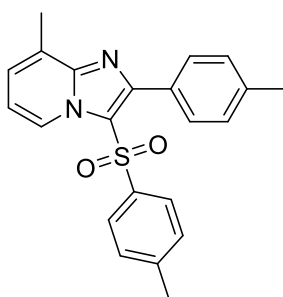

**8-Methyl-2-(p-tolyl)-3-tosylimidazo[1,2-a]pyridine (3m).**

White solid was obtained in 76% isolated yield, 143.7 mg.  $^1\text{H}$  NMR (400 MHz,  $\text{CDCl}_3$ )  $\delta$  8.91 (d,  $J$  = 7.2 Hz, 1H), 7.65 (d,  $J$  = 8.0 Hz, 2H), 7.54 (d,  $J$  = 8.4 Hz, 2H), 7.27 (d,  $J$  = 7.6 Hz, 2H), 7.22–7.16 (m, 1H), 7.13 (d,  $J$  = 8.4 Hz, 2H), 6.92 (t,  $J$  = 7.0 Hz, 1H), 2.61 (s, 3H), 2.42 (s, 3H), 2.30 (s, 3H).  $^{13}\text{C}$  NMR (101 MHz,  $\text{CDCl}_3$ )  $\delta$  152.26, 146.67, 144.05, 138.97, 138.93, 130.33, 129.90, 129.49, 128.33, 127.79, 127.09, 126.20, 124.18, 117.56, 114.34, 21.36, 21.34, 16.94. HRMS (ESI)  $m/z$ :  $[\text{M}+\text{Na}]^+$  Calcd for  $\text{C}_{22}\text{H}_{20}\text{N}_2\text{NaO}_2\text{S}^+$ ; 399.1138, found 399.1136.

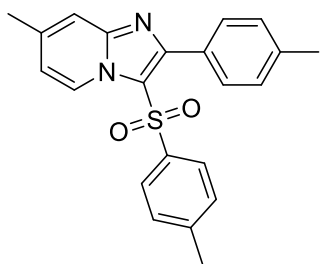

**7-Methyl-2-(p-tolyl)-3-tosylimidazo[1,2-a]pyridine (3n).**

White solid was obtained in 86% isolated yield, 161.9 mg.  $^1\text{H}$  NMR (400 MHz,  $\text{CDCl}_3$ )  $\delta$  8.93 (d,  $J = 7.2$  Hz, 1H), 7.65 (d,  $J = 8.0$  Hz, 2H), 7.53 (d,  $J = 8.4$  Hz, 2H), 7.44 (d,  $J = 0.4$  Hz, 1H), 7.26 (d,  $J = 8.0$  Hz, 2H), 7.14 (d,  $J = 8.4$  Hz, 2H), 6.88–6.83 (m, 1H), 2.43 (s, 6H), 2.32 (s, 3H).  $^{13}\text{C}$  NMR (101 MHz,  $\text{CDCl}_3$ )  $\delta$  153.09, 147.01, 144.08, 139.89, 139.17, 130.32, 129.75, 129.58, 128.43, 126.20, 125.79, 116.93, 116.65, 116.33, 21.46, 21.44, 21.31. HRMS (ESI)  $m/z$ :  $[\text{M}+\text{Na}]^+$  Calcd for  $\text{C}_{22}\text{H}_{20}\text{N}_2\text{NaO}_2\text{S}^+$ ; 399.1138, found 399.1145.

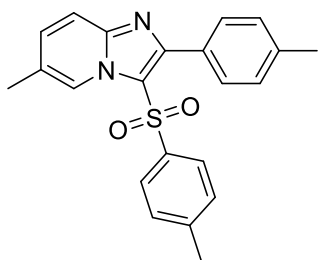

**6-Methyl-2-(p-tolyl)-3-tosylimidazo[1,2-a]pyridine (3o).**

White solid was obtained in 71% isolated yield, 133.5 mg.  $^1\text{H}$  NMR (400 MHz,  $\text{CDCl}_3$ )  $\delta$  8.86 (s, 1H), 7.63 (d,  $J = 8.0$  Hz, 2H), 7.60 (d,  $J = 9.2$  Hz, 1H), 7.54 (d,  $J = 8.4$  Hz, 2H), 7.27 (d,  $J = 18.0$  Hz, 2H), 7.15 (d,  $J = 8.4$  Hz, 2H), 2.43 (s, 3H), 2.41 (s, 3H), 2.32 (s, 3H).  $^{13}\text{C}$  NMR (101 MHz,  $\text{CDCl}_3$ )  $\delta$  152.63, 147.44, 145.46, 144.15, 139.10, 139.06, 131.39, 130.27, 129.69, 129.57, 128.39, 126.20, 124.43, 124.38, 116.97, 116.85, 21.44, 21.39, 18.53. HRMS (ESI)  $m/z$ :  $[\text{M}+\text{Na}]^+$  Calcd for  $\text{C}_{22}\text{H}_{20}\text{N}_2\text{NaO}_2\text{S}^+$ ; 399.1138, found 399.1128.

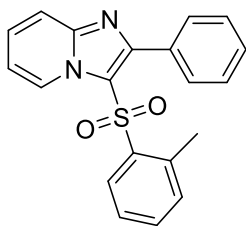

**2-Phenyl-3-(o-tolylsulfonyl)imidazo[1,2-a]pyridine (4a).**

White solid was obtained in 71% isolated yield, 49.2 mg.  $^1\text{H}$  NMR (400 MHz,  $\text{CDCl}_3$ )  $\delta$  9.05 (d,  $J$  = 6.8 Hz, 1H), 7.92–7.69 (m, 2H), 7.70–7.57 (m, 2H), 7.47 (d,  $J$  = 1.2 Hz, 1H), 7.40–7.23 (m, 4H), 7.18–6.96 (m, 3H), 2.09 (s, 3H).  $^{13}\text{C}$  NMR (101 MHz,  $\text{CDCl}_3$ )  $\delta$  152.78, 146.35, 139.06, 137.68, 133.22, 132.48, 132.19, 130.35, 129.16, 128.77, 128.37, 127.68, 127.00, 125.67, 117.92, 116.70, 114.46, 19.19. HRMS (ESI)  $m/z$ :  $[\text{M}+\text{H}]^+$  Calcd for  $\text{C}_{20}\text{H}_{17}\text{N}_2\text{O}_2\text{S}^+$ ; 349.1005, found 349.1002.

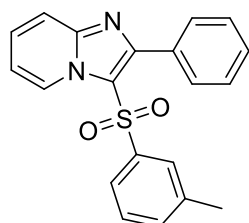

**2-Phenyl-3-(*m*-tolylsulfonyl)imidazo[1,2-*a*]pyridine (4b).**

White solid was obtained in 93% isolated yield, 64.7 mg.  $^1\text{H}$  NMR (400 MHz,  $\text{CDCl}_3$ )  $\delta$  9.14 (d,  $J$  = 7.2 Hz, 1H), 7.87–7.62 (m, 3H), 7.53–7.40 (m, 5H), 7.37 (s, 1H), 7.35–7.14 (m, 2H), 7.13–6.99 (m, 1H), 2.25 (s, 3H).  $^{13}\text{C}$  NMR (101 MHz,  $\text{CDCl}_3$ )  $\delta$  152.88, 146.54, 141.68, 139.24, 134.07, 132.58, 130.42, 129.27, 128.80, 128.44, 127.71, 126.81, 126.69, 123.35, 117.90, 117.58, 114.53, 21.14. HRMS (ESI)  $m/z$ :  $[\text{M}+\text{H}]^+$  Calcd for  $\text{C}_{20}\text{H}_{17}\text{N}_2\text{O}_2\text{S}^+$ ; 349.1005, found 349.0097.

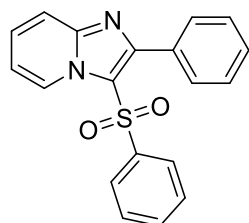

**2-Phenyl-3-(phenylsulfonyl)imidazo[1,2-*a*]pyridine (4c).<sup>1</sup>**

White solid was obtained in 87% isolated yield, 58.3 mg.  $^1\text{H}$  NMR (400 MHz,  $\text{CDCl}_3$ )  $\delta$  9.13 (d,  $J$  = 7.2 Hz, 1H), 7.78–7.69 (m, 3H), 7.63 (d,  $J$  = 7.6 Hz, 2H), 7.55–7.42 (m, 5H), 7.34 (t,  $J$  = 7.8 Hz, 2H), 7.06 (t,  $J$  = 6.6 Hz, 1H).  $^{13}\text{C}$  NMR (101 MHz,  $\text{CDCl}_3$ )  $\delta$  153.06, 146.64, 141.86, 133.30, 132.50, 130.45, 129.33, 129.00, 128.54, 127.76, 126.78, 126.26, 117.96, 117.35, 114.61.

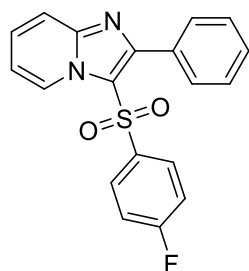

**3-((4-Fluorophenyl)sulfonyl)-2-phenylimidazo[1,2-*a*]pyridine (4d).<sup>1</sup>**

White solid was obtained in 87% isolated yield, 70.0 mg.  $^1\text{H}$  NMR (400 MHz,  $\text{CDCl}_3$ )  $\delta$  9.14 (d,  $J$  = 7.2 Hz, 1H), 7.77–7.69 (m, 3H), 7.67–7.58 (m, 2H), 7.54–7.44 (m, 4H), 7.13–7.06 (m, 1H), 7.04–6.97 (m, 2H).  $^{13}\text{C}$  NMR (101 MHz,  $\text{CDCl}_3$ )  $\delta$  165.28 (d,  $J_{\text{C-F}}$  = 256.3 Hz), 152.82, 146.51, 137.75 (d,  $J_{\text{C-F}}$  = 3.1 Hz), 132.20, 130.35, 129.40, 129.08 (d,  $J_{\text{C-F}}$  = 9.6 Hz), 128.72, 127.76, 126.63, 117.90, 117.23, 116.20 (d,  $J_{\text{C-F}}$  = 22.7 Hz), 114.77.  $^{19}\text{F}$  NMR (376 MHz,  $\text{CDCl}_3$ )  $\delta$  -103.54.

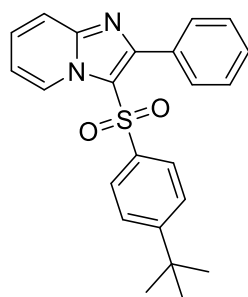

**3-((4-(Tert-butyl)phenyl)sulfonyl)-2-phenylimidazo[1,2-a]pyridine (4e).**

White solid was obtained in 58% isolated yield, 45.4 mg.  $^1\text{H}$  NMR (400 MHz,  $\text{CDCl}_3$ )  $\delta$  9.13 (d,  $J$  = 6.8 Hz, 1H), 7.82–7.67 (m, 3H), 7.58 (d,  $J$  = 8.8 Hz, 2H), 7.52–7.42 (m, 4H), 7.35 (d,  $J$  = 8.4 Hz, 2H), 7.06 (t,  $J$  = 6.8 Hz, 1H), 1.25 (s, 9H).  $^{13}\text{C}$  NMR (101 MHz,  $\text{CDCl}_3$ )  $\delta$  157.24, 152.69, 146.50, 138.78, 132.61, 130.44, 129.22, 128.39, 127.71, 126.83, 126.22, 126.02, 117.90, 117.76, 114.50, 35.10, 30.89. HRMS (ESI)  $m/z$ :  $[\text{M}+\text{H}]^+$  Calcd for  $\text{C}_{23}\text{H}_{23}\text{N}_2\text{O}_2\text{S}^+$ ; 391.1475, found 391.1465.

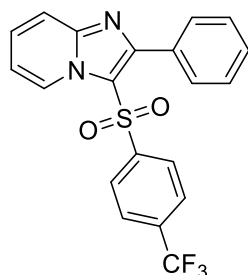

**2-Phenyl-3-((4-(trifluoromethyl)phenyl)sulfonyl)imidazo[1,2-a]pyridine (4f).<sup>1</sup>**

White solid was obtained in 79% NMR quantitative yield.  $^1\text{H}$  NMR (400 MHz,  $\text{CDCl}_3$ )  $\delta$  9.17 (d,  $J$  = 6.8 Hz, 1H), 7.82–7.67 (m, 5H), 7.59 (d,  $J$  = 8.4 Hz, 2H), 7.55–7.43 (m, 4H), 7.12 (t,  $J$  = 7.0 Hz, 1H).  $^{13}\text{C}$  NMR (101 MHz,  $\text{CDCl}_3$ )  $\delta$  153.77, 146.95, 145.24, 134.80 (d,  $J_{\text{C-F}}$  = 33.1 Hz), 132.13, 130.44, 129.64, 129.07, 127.91, 126.77, 126.14 (d,  $J_{\text{C-F}}$  = 3.7 Hz), 122.93 (d,  $J_{\text{C-F}}$  = 273.1 Hz), 118.16, 116.50, 115.02.  $^{19}\text{F}$  NMR (376 MHz,  $\text{CDCl}_3$ )  $\delta$  -63.24.

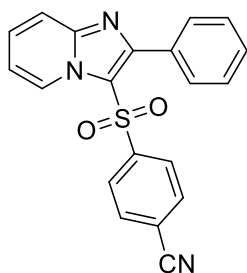

**4-((2-Phenylimidazo[1,2-a]pyridin-3-yl)sulfonyl)benzonitrile (4g).**

White solid was obtained in 66% isolated yield, 47.1 mg.  $^1\text{H}$  NMR (400 MHz,  $\text{CDCl}_3$ )  $\delta$  9.17 (d,  $J = 7.2$  Hz, 1H), 7.76 (d,  $J = 8.8$  Hz, 1H), 7.72–7.57 (m, 6H), 7.57–7.43 (m, 4H), 7.13 (t,  $J = 7.0$  Hz, 1H).  $^{13}\text{C}$  NMR (101 MHz,  $\text{CDCl}_3$ )  $\delta$  154.04, 147.07, 145.73, 132.72, 132.00, 130.39, 129.74, 129.22, 127.95, 126.77, 126.74, 118.21, 116.99, 116.80, 116.07, 115.13. HRMS (ESI)  $m/z$ :  $[\text{M}+\text{H}]^+$  Calcd for  $\text{C}_{20}\text{H}_{14}\text{N}_3\text{O}_2\text{S}^+$ ; 360.0801, found 360.0795.

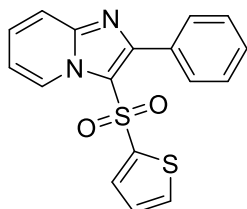

**2-Phenyl-3-(thiophen-2-ylsulfonyl)imidazo[1,2-a]pyridine (4h).**

White solid was obtained in 69% NMR quantitative yield.  $^1\text{H}$  NMR (400 MHz,  $\text{DMSO}-\text{D}_6$ )  $\delta$  8.99 (d,  $J = 6.8$  Hz, 1H), 8.03 (d,  $J = 4.8$  Hz, 1H), 7.91 (d,  $J = 2.8$  Hz, 1H), 7.86 (d,  $J = 8.8$  Hz, 1H), 7.79–7.62 (m, 3H), 7.55–7.48 (m, 3H), 7.33 (t,  $J = 7.0$  Hz, 1H), 7.21–7.13 (m, 1H).  $^{13}\text{C}$  NMR (101 MHz,  $\text{DMSO}-\text{D}_6$ )  $\delta$  152.08, 146.78, 142.52, 136.12, 133.83, 133.11, 130.70, 130.29, 129.68, 128.78, 128.17, 127.27, 118.16, 117.29, 116.21. HRMS (ESI)  $m/z$ :  $[\text{M}+\text{Na}]^+$  Calcd for  $\text{C}_{17}\text{H}_{12}\text{N}_2\text{NaO}_2\text{S}_2^+$ ; 363.0232, found 363.0232.

## References:

1. Yu-Jing Guo, Shuai Lu, Lu-Lu Tian, En-Ling Huang, Xin-Qi Hao, Xinju Zhu,\* Tian Shao,\*and Mao-Ping Song, Iodine-Mediated Difunctionalization of Imidazopyridines with Sodium Sulfinates Synthesis of Sulfones and Sulfides. *J. Org. Chem.* 2018, **83**, 338–349

# Copies of $^1\text{H}$ NMR, $^{13}\text{C}$ NMR and $^{19}\text{F}$ NMR Spectra

## $^1\text{H}$ NMR (400 MHz, $\text{CDCl}_3$ ) spectrum of 3a

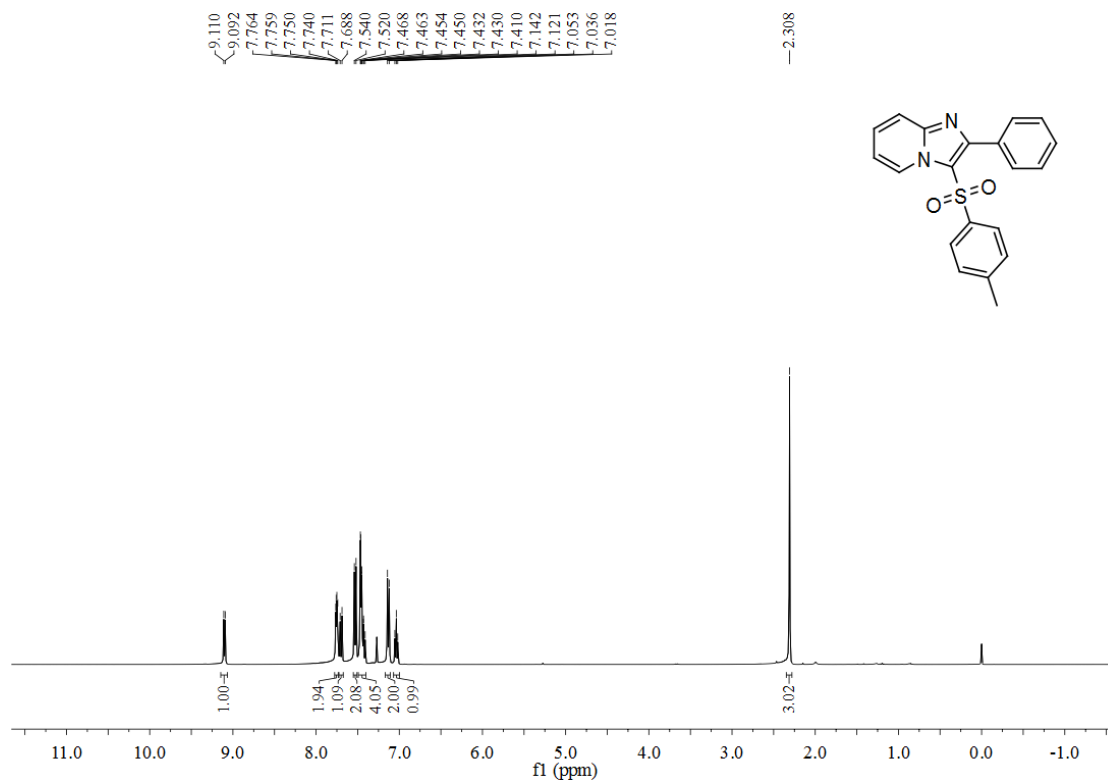

## $^{13}\text{C}$ NMR (101 MHz, $\text{CDCl}_3$ ) spectrum of 3a

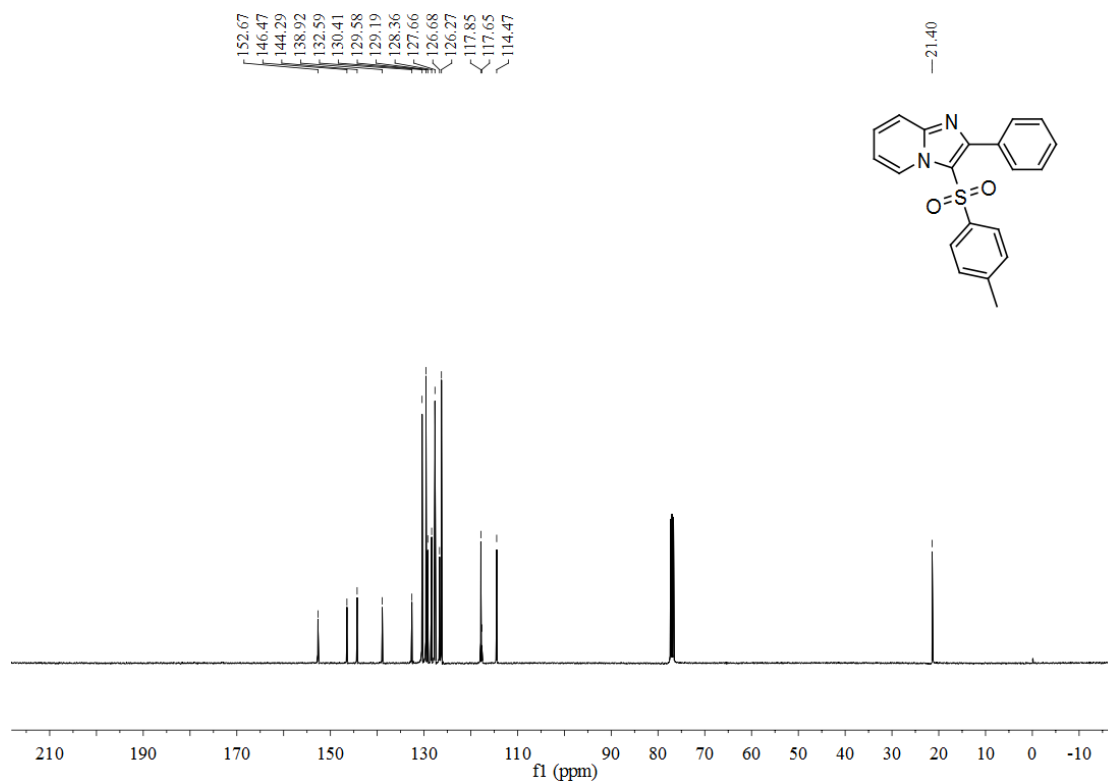



### <sup>1</sup>H NMR (400 MHz, CDCl<sub>3</sub>) spectrum of 3b

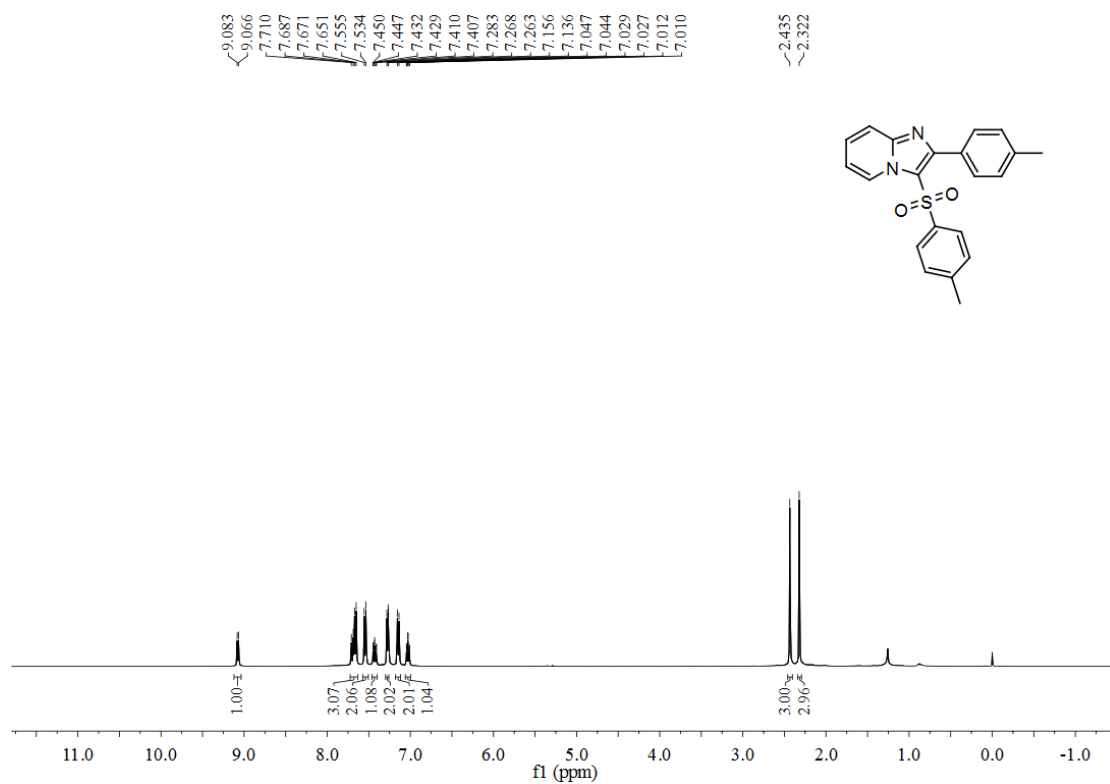

### <sup>13</sup>C NMR (101 MHz, CDCl<sub>3</sub>) spectrum of 3b

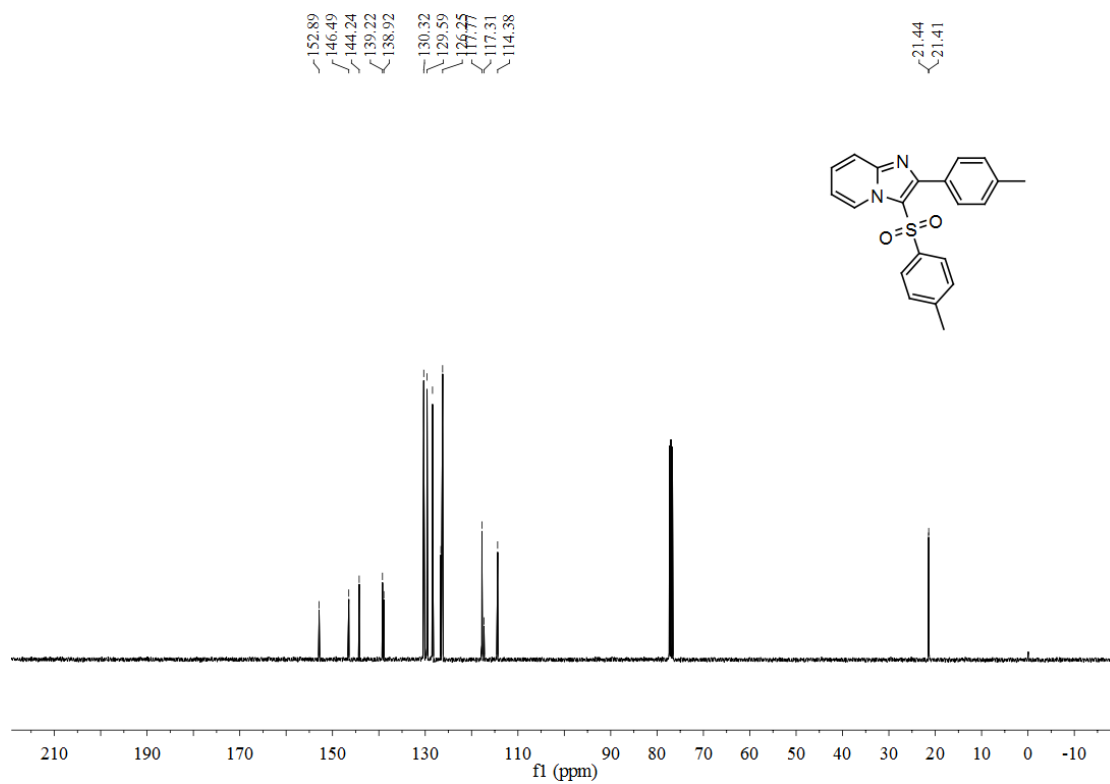

### <sup>1</sup>H NMR (400 MHz, CDCl<sub>3</sub>) spectrum of 3c

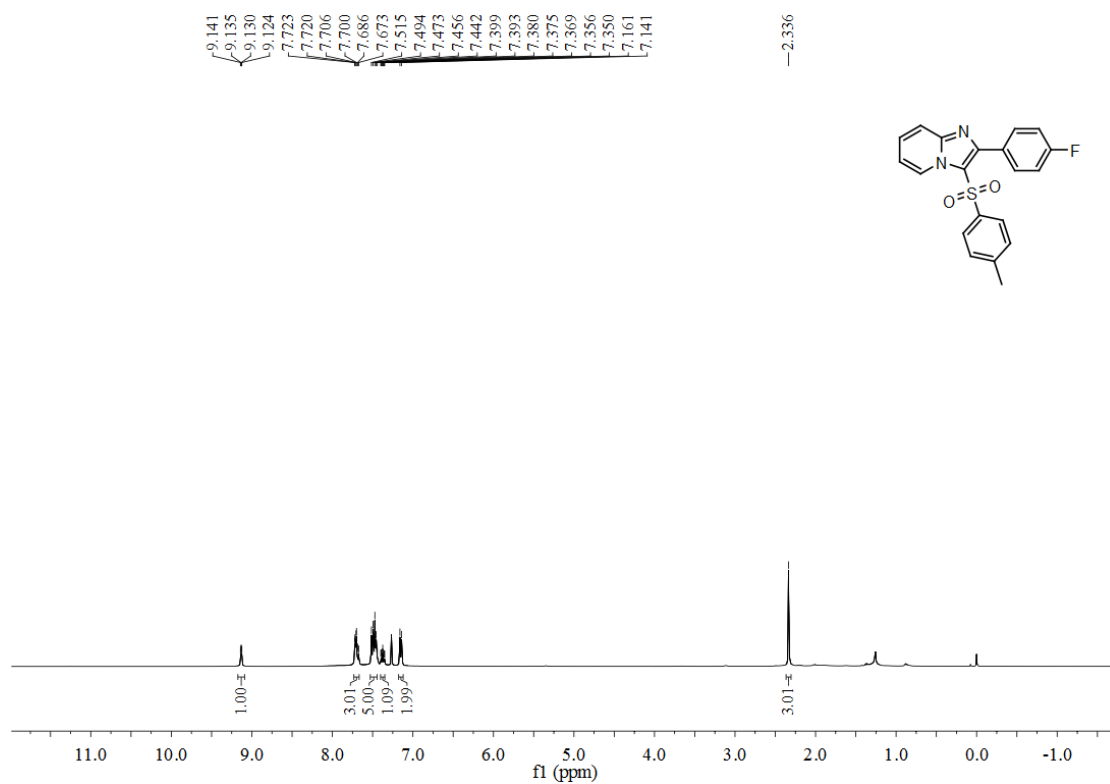

### <sup>13</sup>C NMR (101 MHz, CDCl<sub>3</sub>) spectrum of 3c

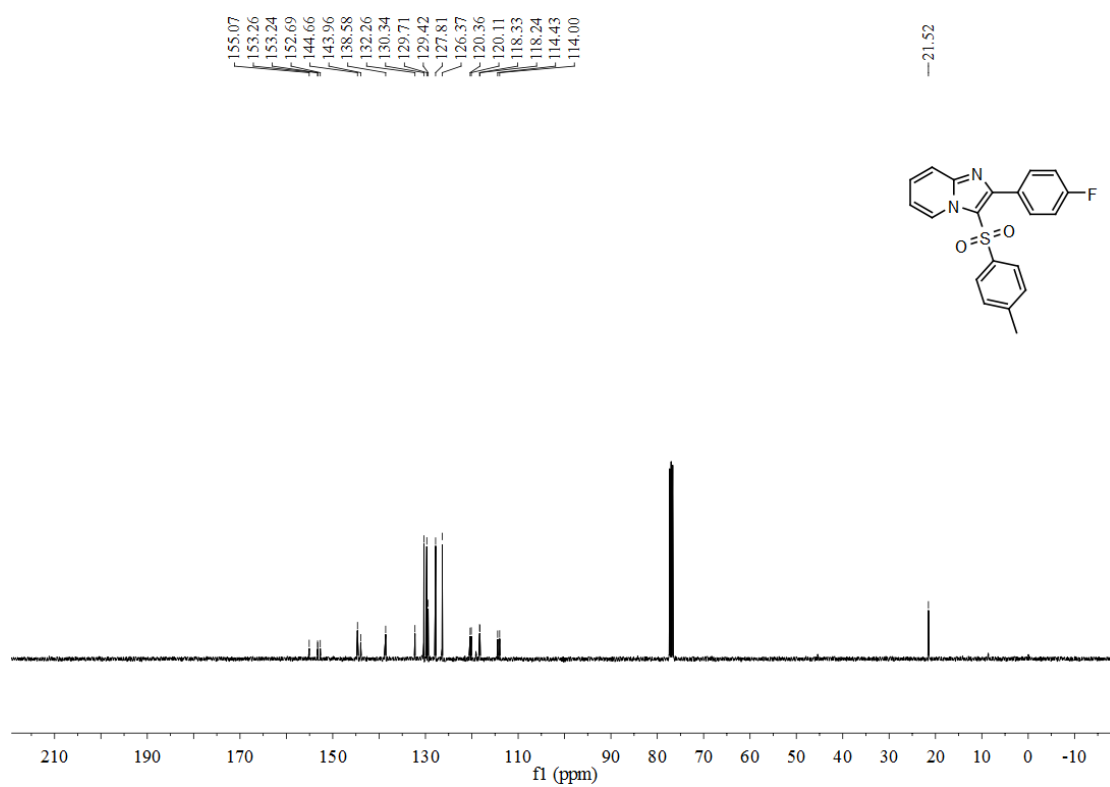

**<sup>19</sup>F NMR (376 MHz, CDCl<sub>3</sub>) spectrum of 3c**

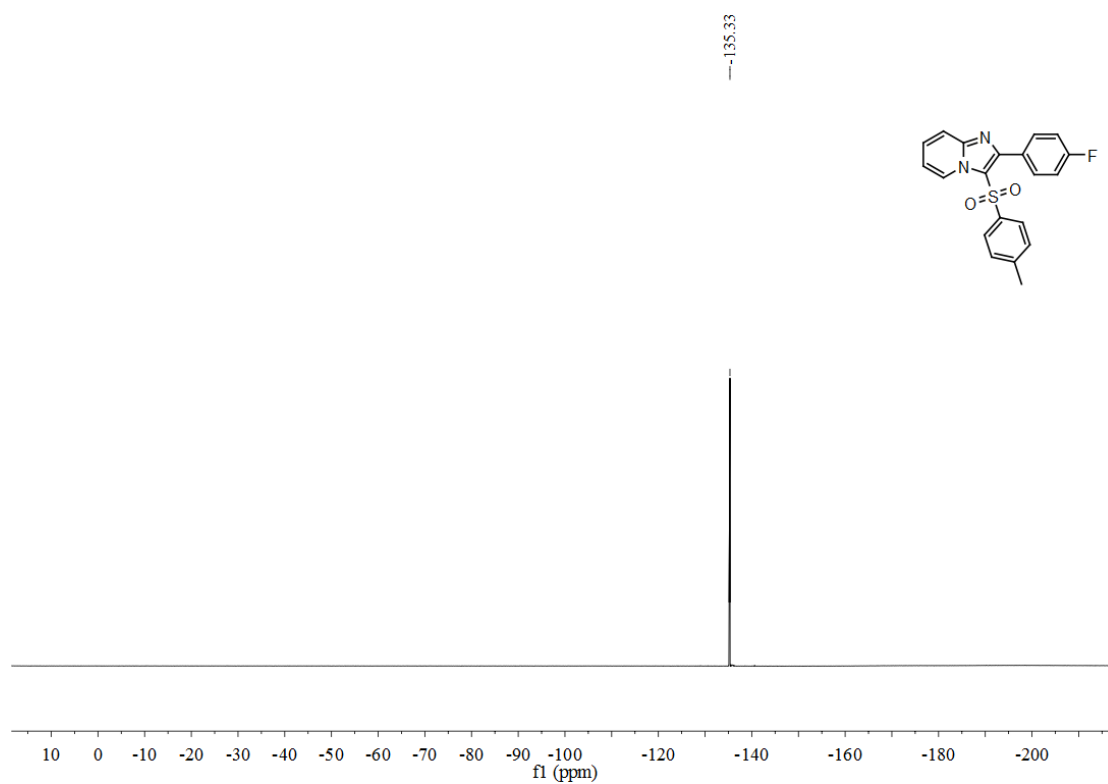

**<sup>1</sup>H NMR (400 MHz, CDCl<sub>3</sub>) spectrum of 3d**

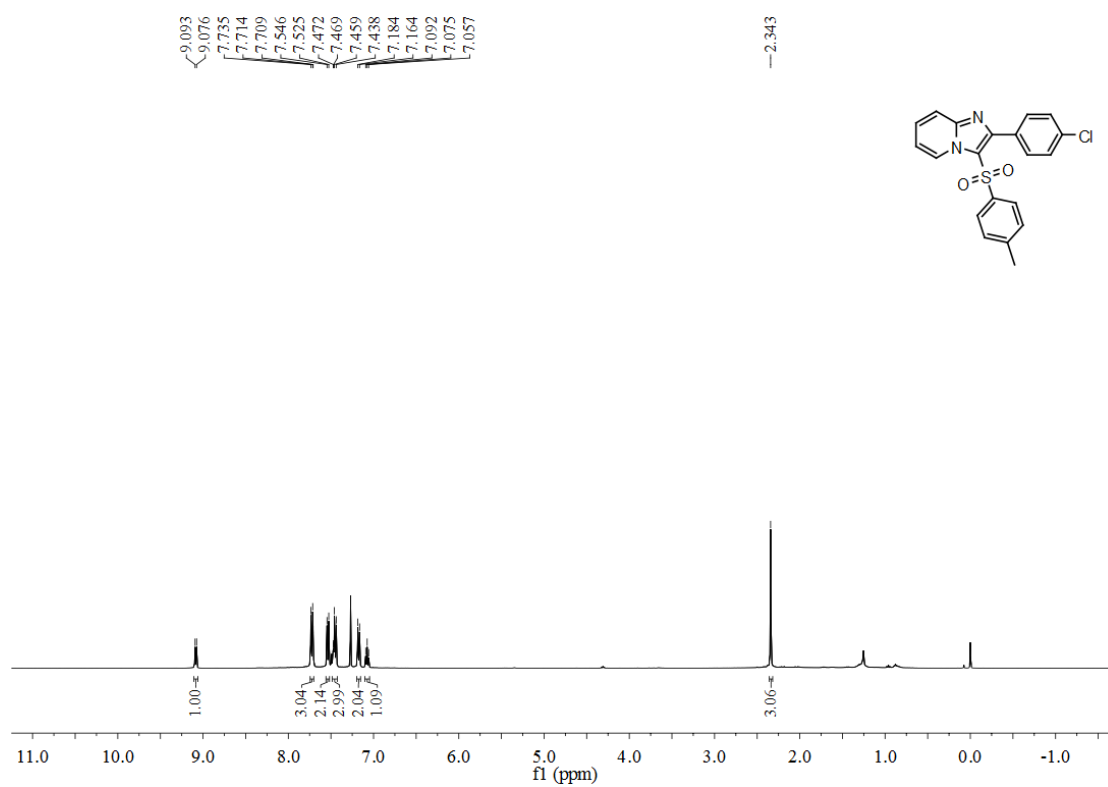

**<sup>13</sup>C NMR (101 MHz, CDCl<sub>3</sub>) spectrum of 3d**

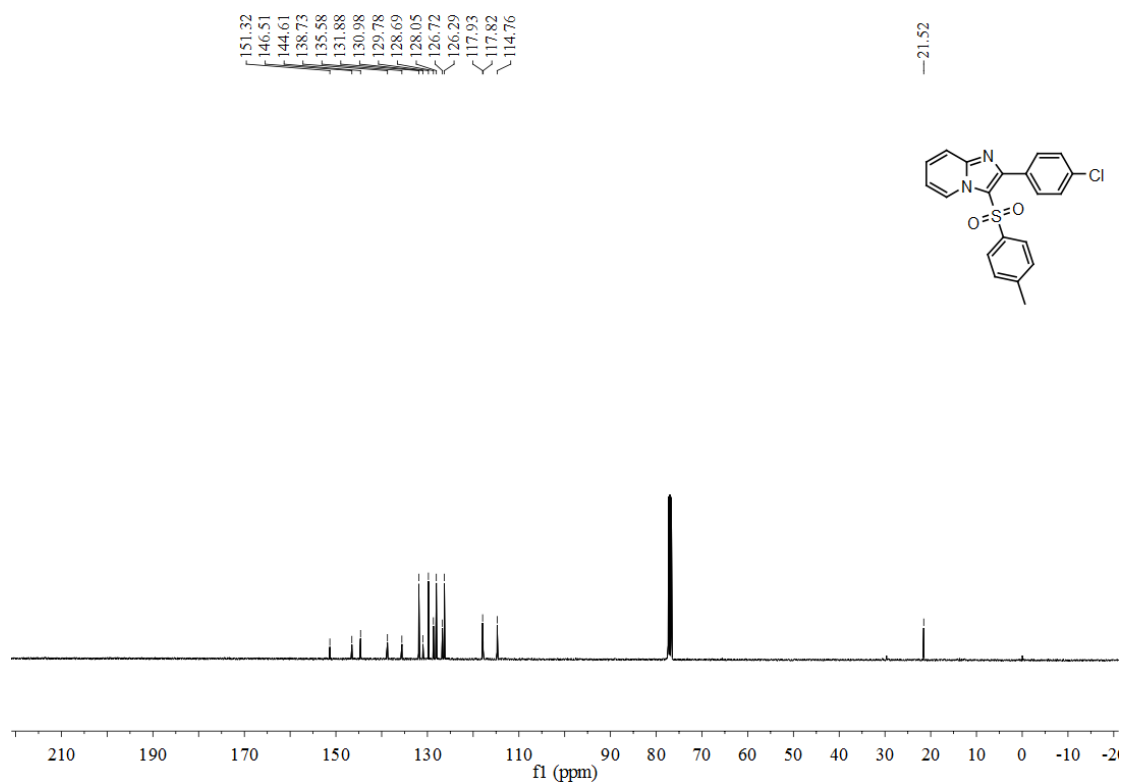

**<sup>1</sup>H NMR (400 MHz, CDCl<sub>3</sub>) spectrum of 3e**

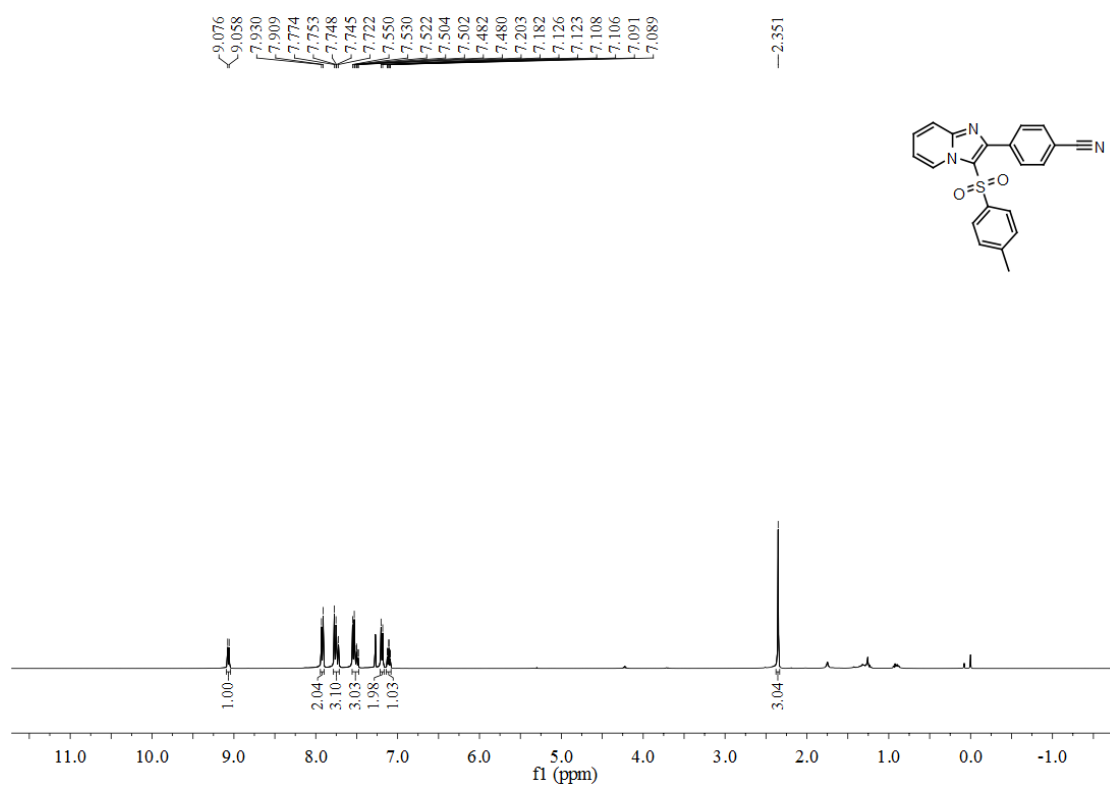

### <sup>13</sup>C NMR (101 MHz, CDCl<sub>3</sub>) spectrum of 3e

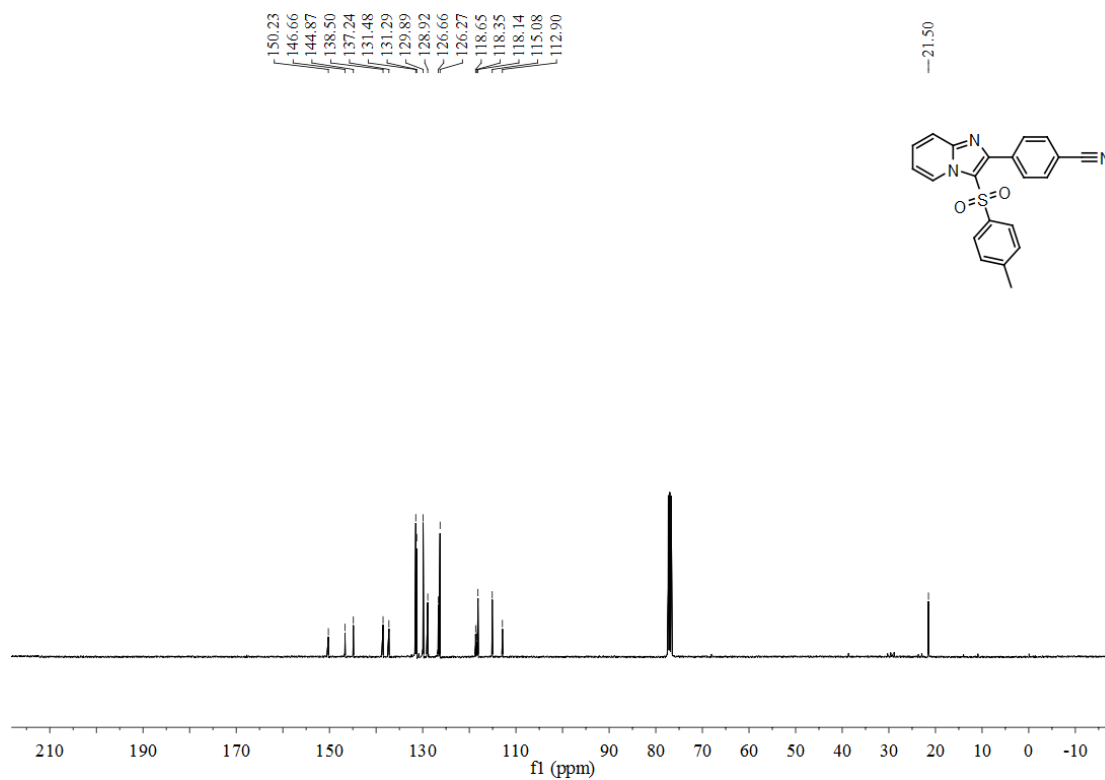

### <sup>1</sup>H NMR (400 MHz, CDCl<sub>3</sub>) spectrum of 3f

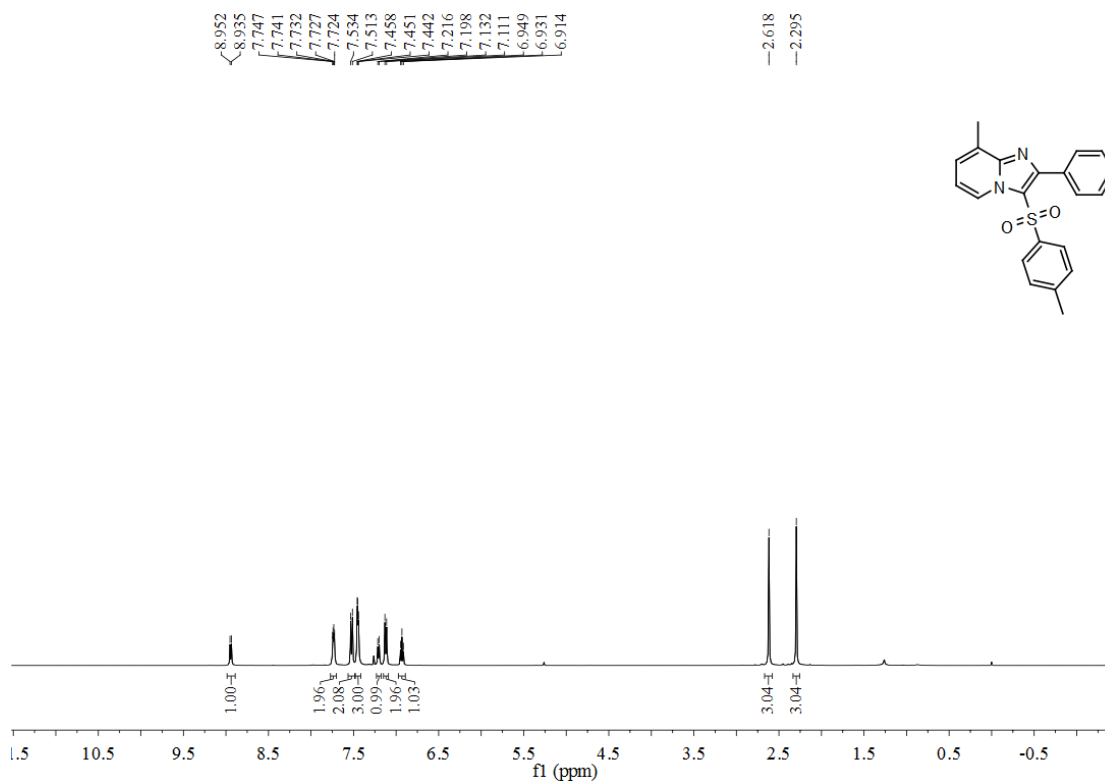

**<sup>13</sup>C NMR (101 MHz, CDCl<sub>3</sub>) spectrum of 3f**

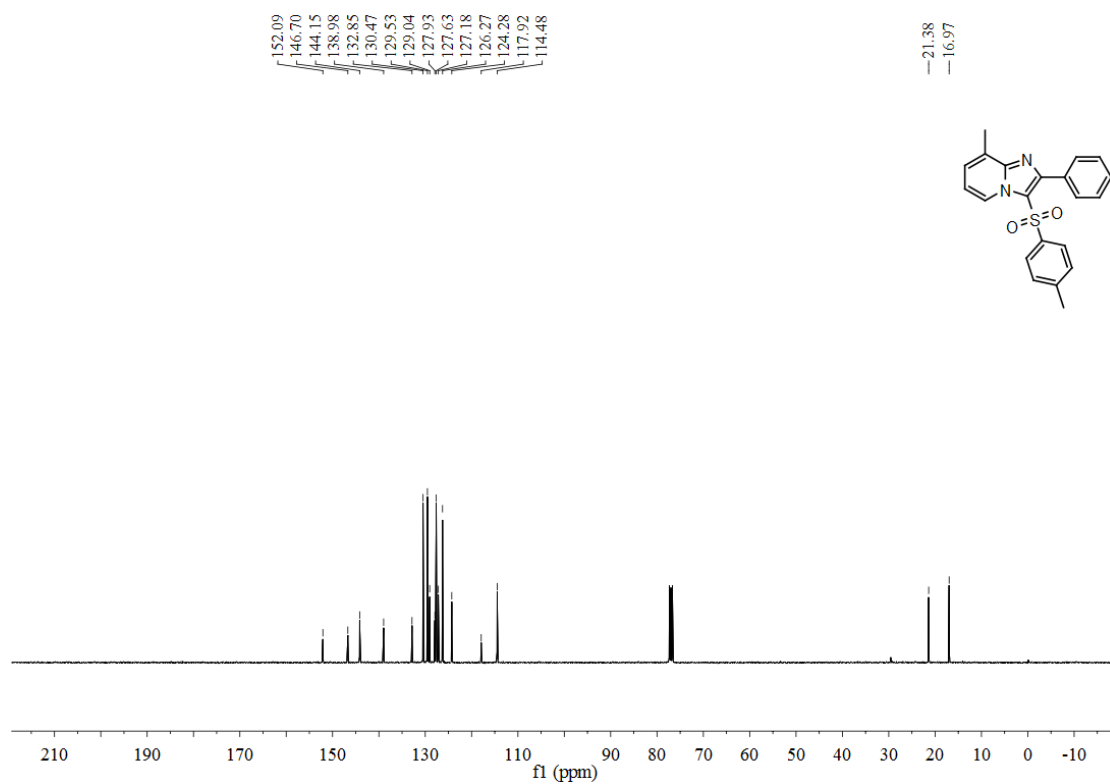

**<sup>1</sup>H NMR (400 MHz, CDCl<sub>3</sub>) spectrum of 3g**

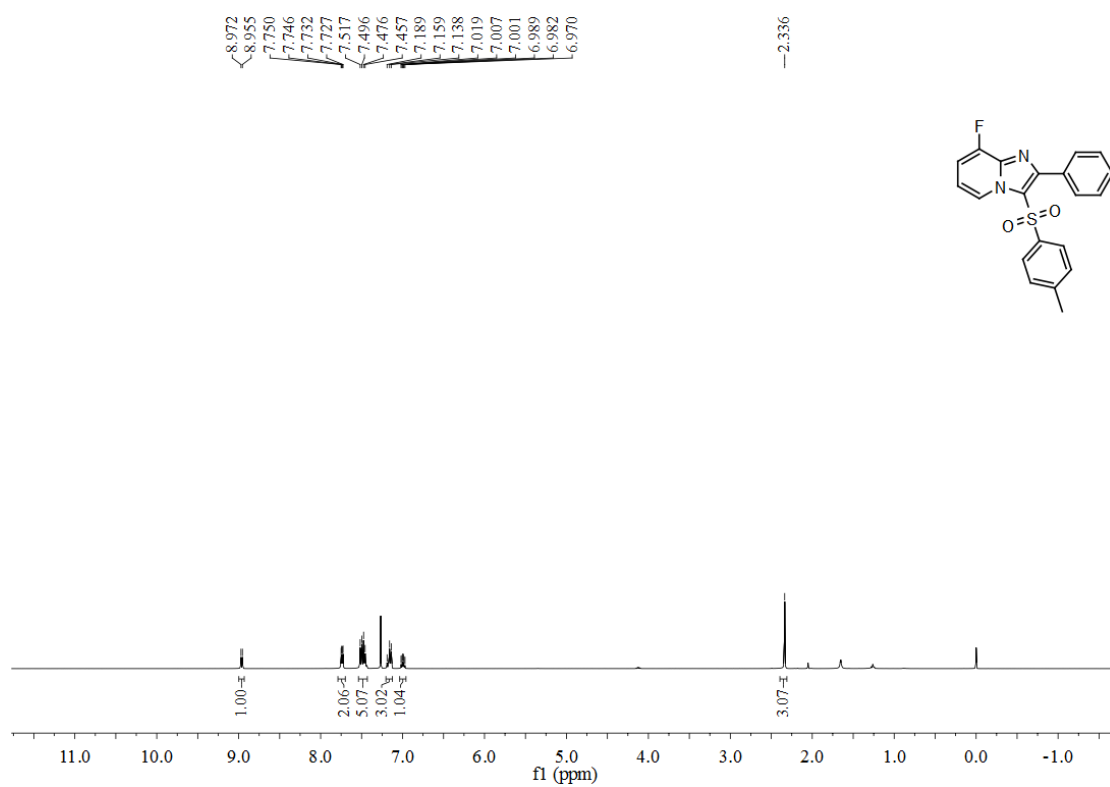

**<sup>13</sup>C NMR (101 MHz, CDCl<sub>3</sub>) spectrum of 3g**

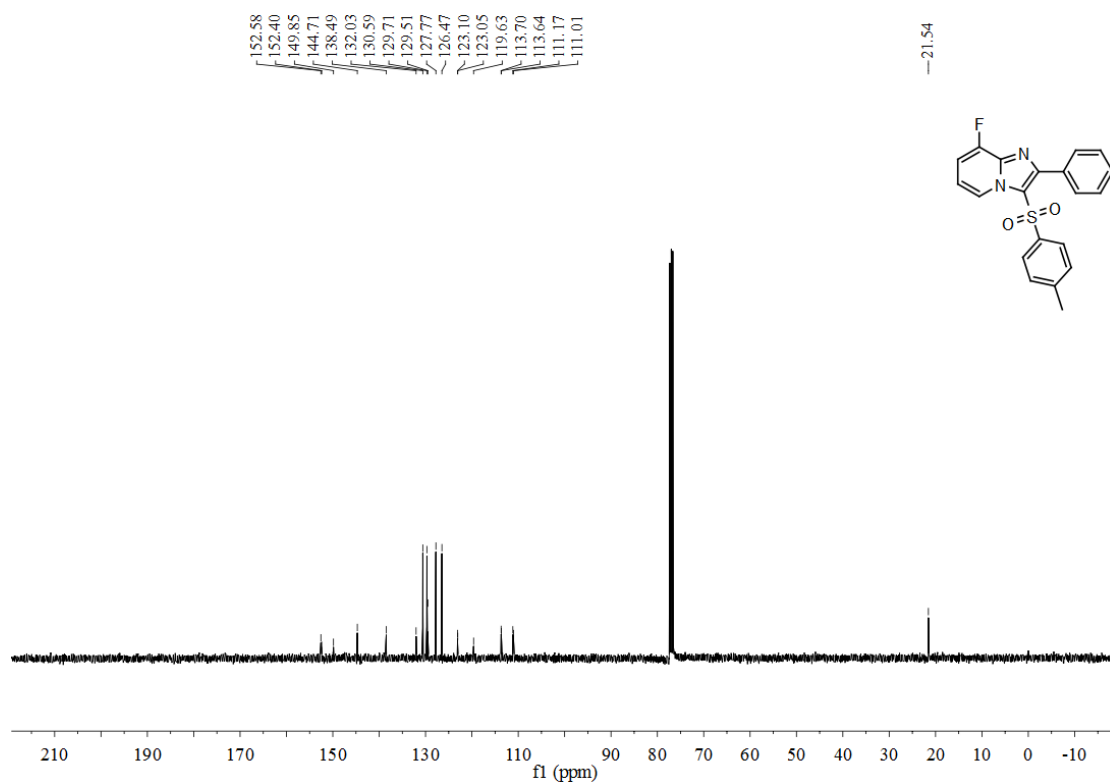

**<sup>19</sup>F NMR (376 MHz, CDCl<sub>3</sub>) spectrum of 3g**

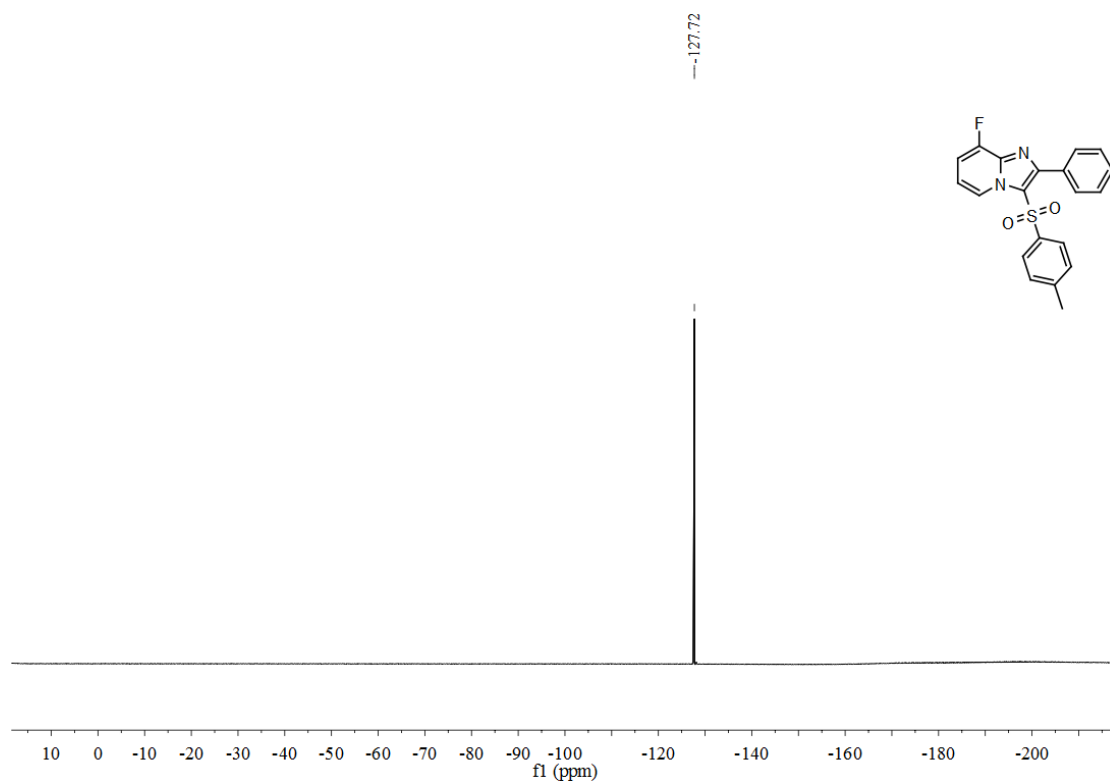

### <sup>1</sup>H NMR (400 MHz, DMSO-D<sub>6</sub>) spectrum of 3h

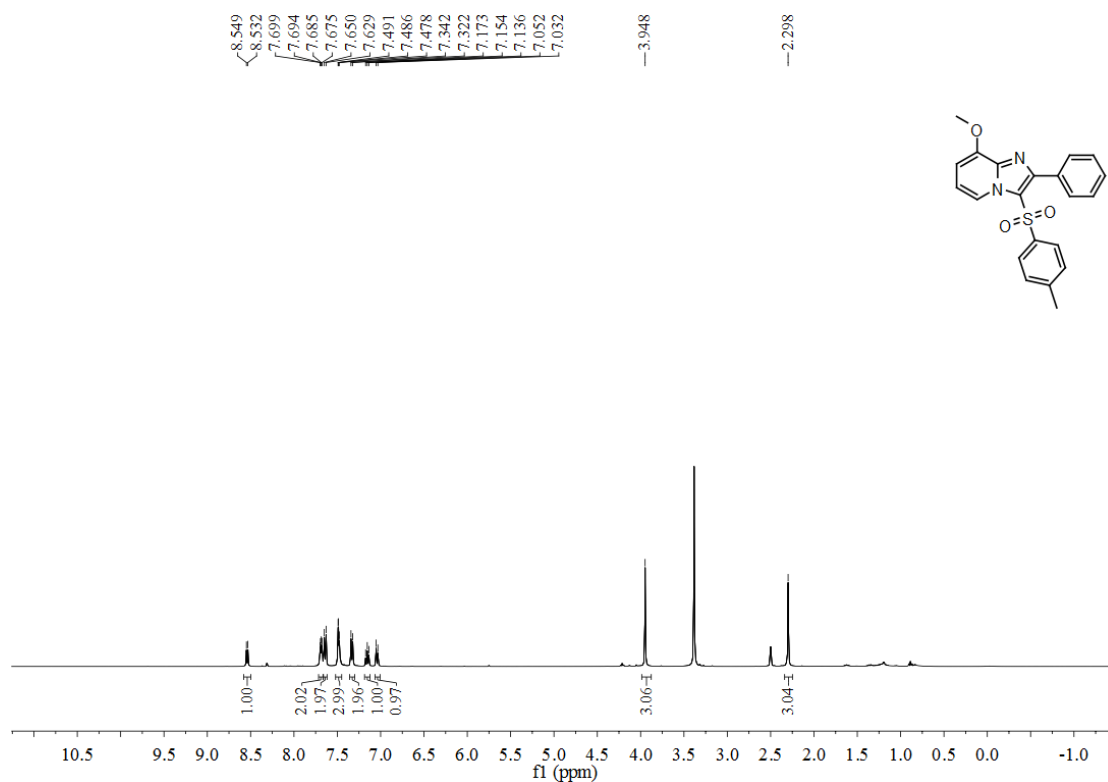

### <sup>13</sup>C NMR (101 MHz, DMSO-D<sub>6</sub>) spectrum of 3h

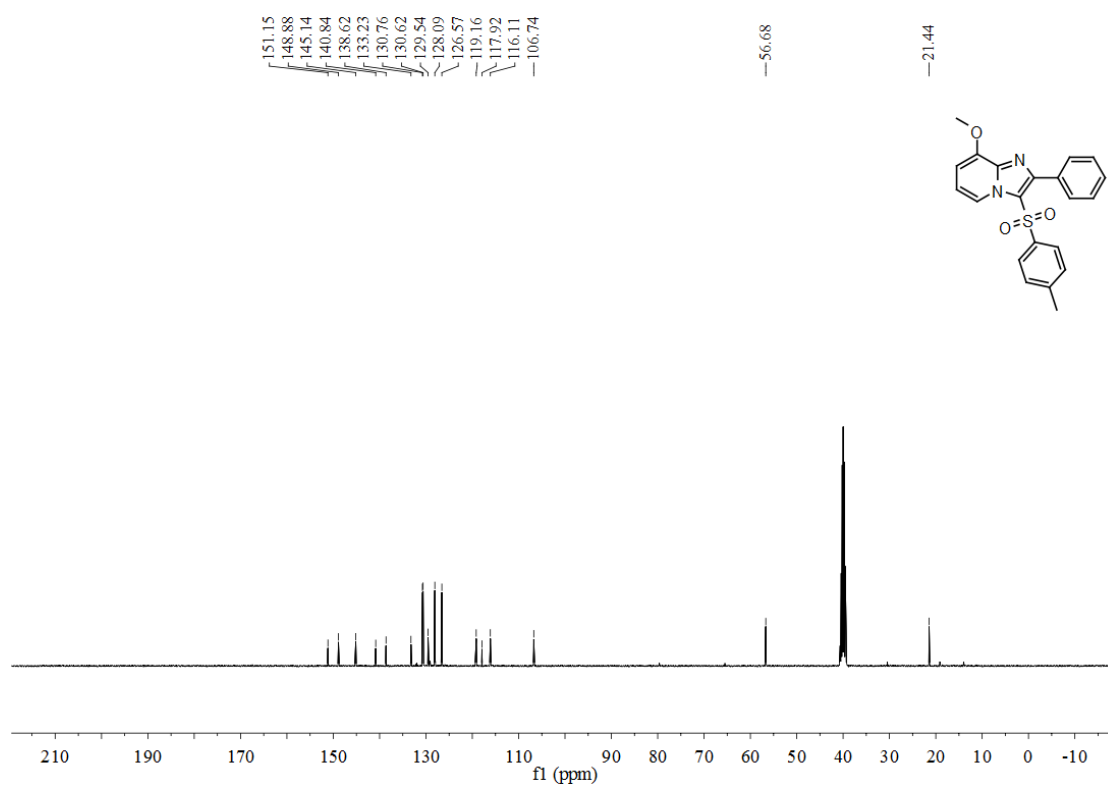



### <sup>1</sup>H NMR (400 MHz, CDCl<sub>3</sub>) spectrum of 3i

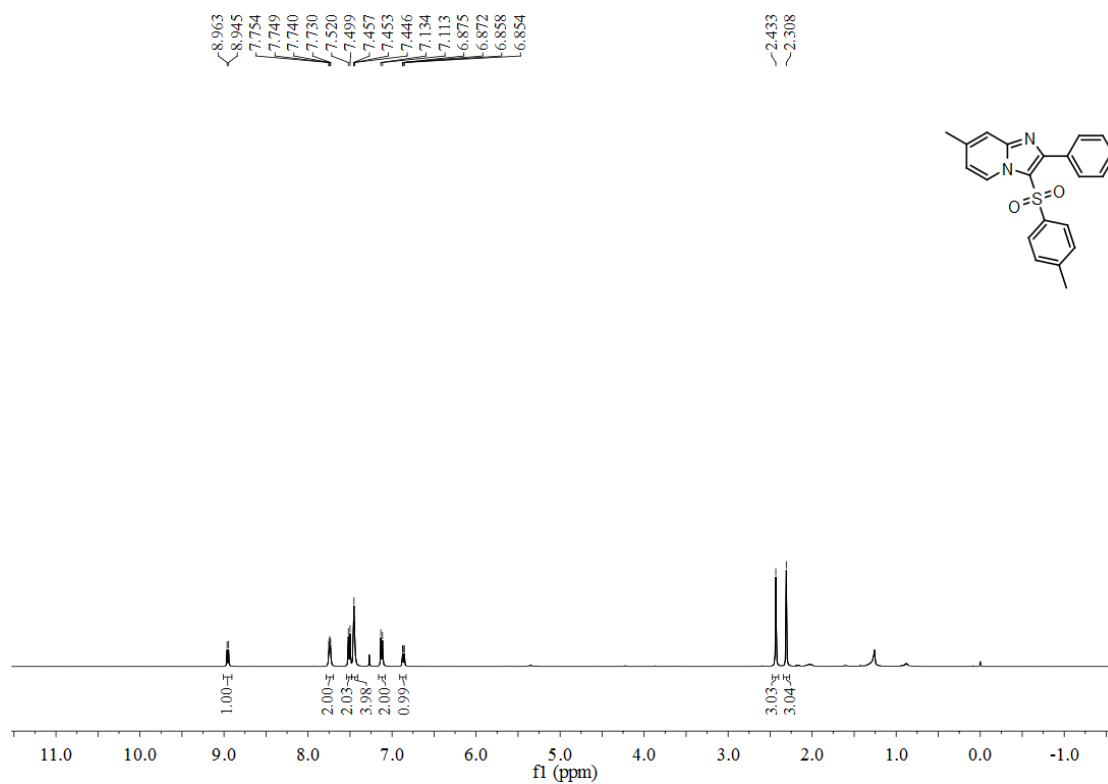

### <sup>13</sup>C NMR (101 MHz, CDCl<sub>3</sub>) spectrum of 3i

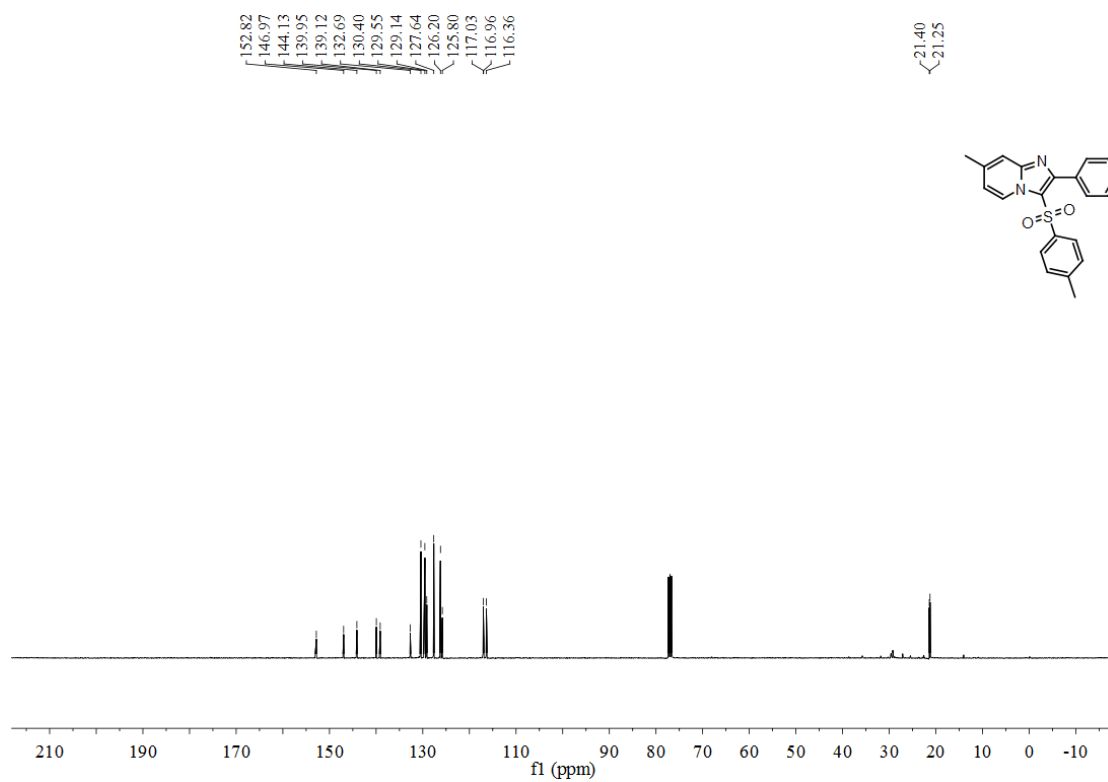

### <sup>1</sup>H NMR (400 MHz, CDCl<sub>3</sub>) spectrum of 3j

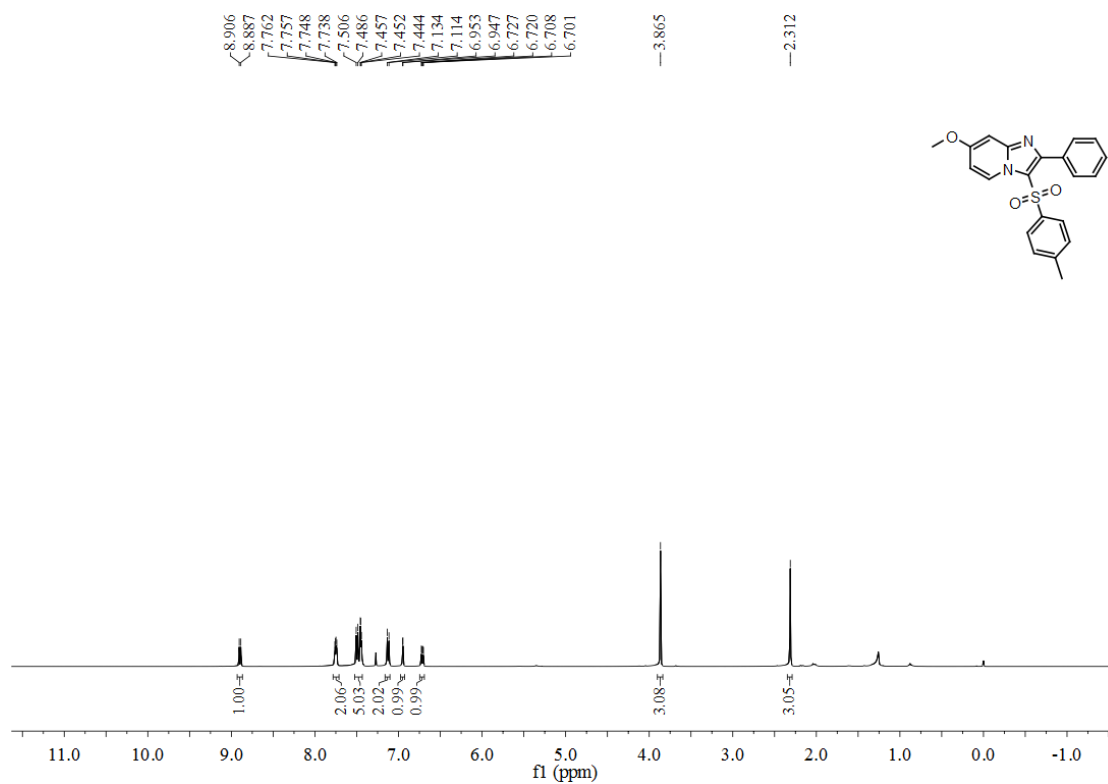

### <sup>13</sup>C NMR (101 MHz, CDCl<sub>3</sub>) spectrum of 3j

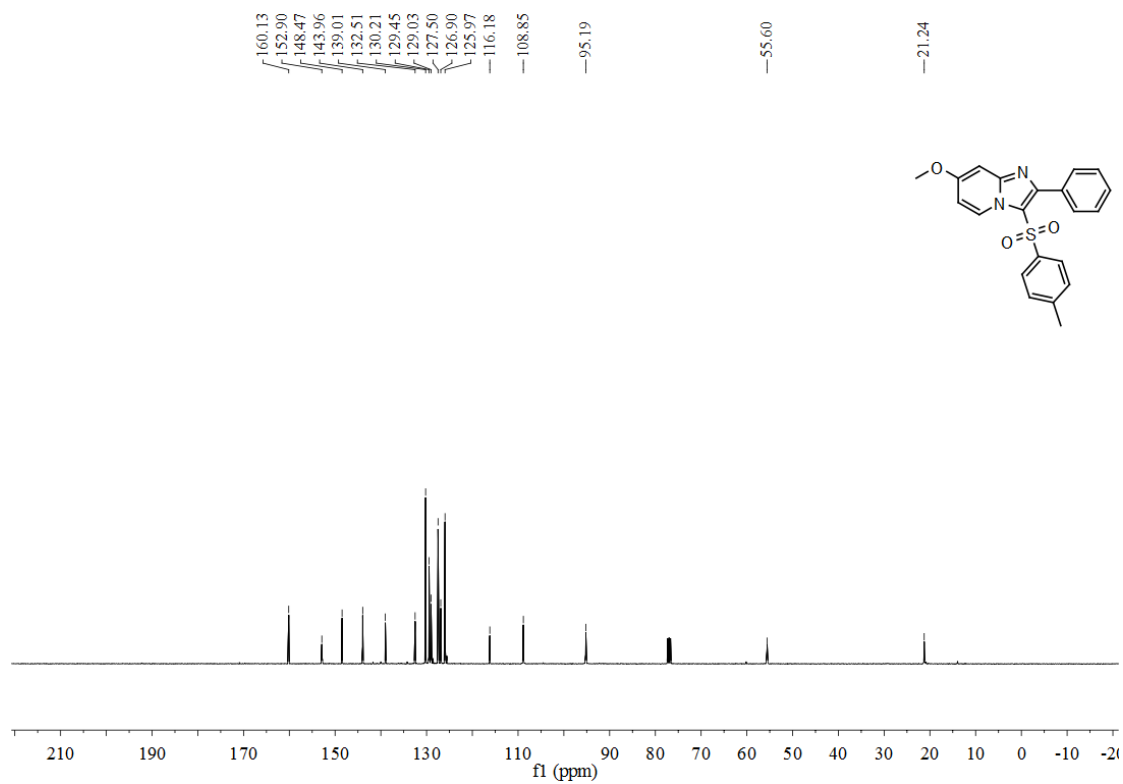

### <sup>1</sup>H NMR (400 MHz, CDCl<sub>3</sub>) spectrum of 3k

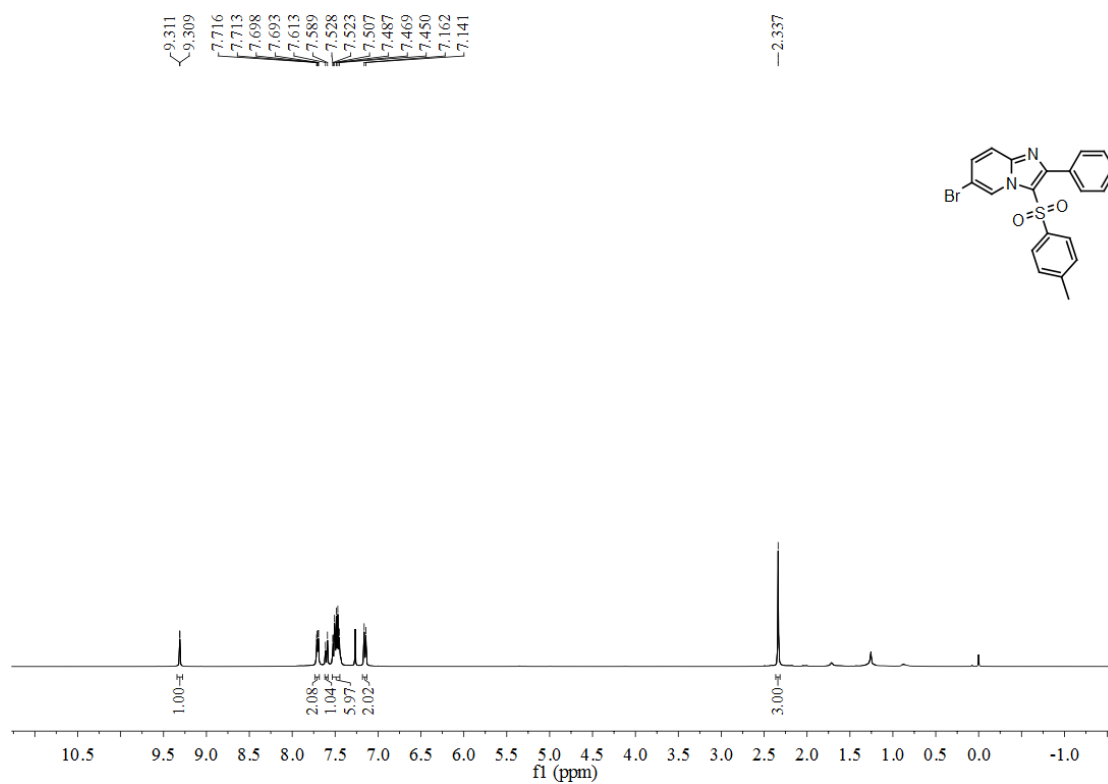

### <sup>13</sup>C NMR (101 MHz, CDCl<sub>3</sub>) spectrum of 3k

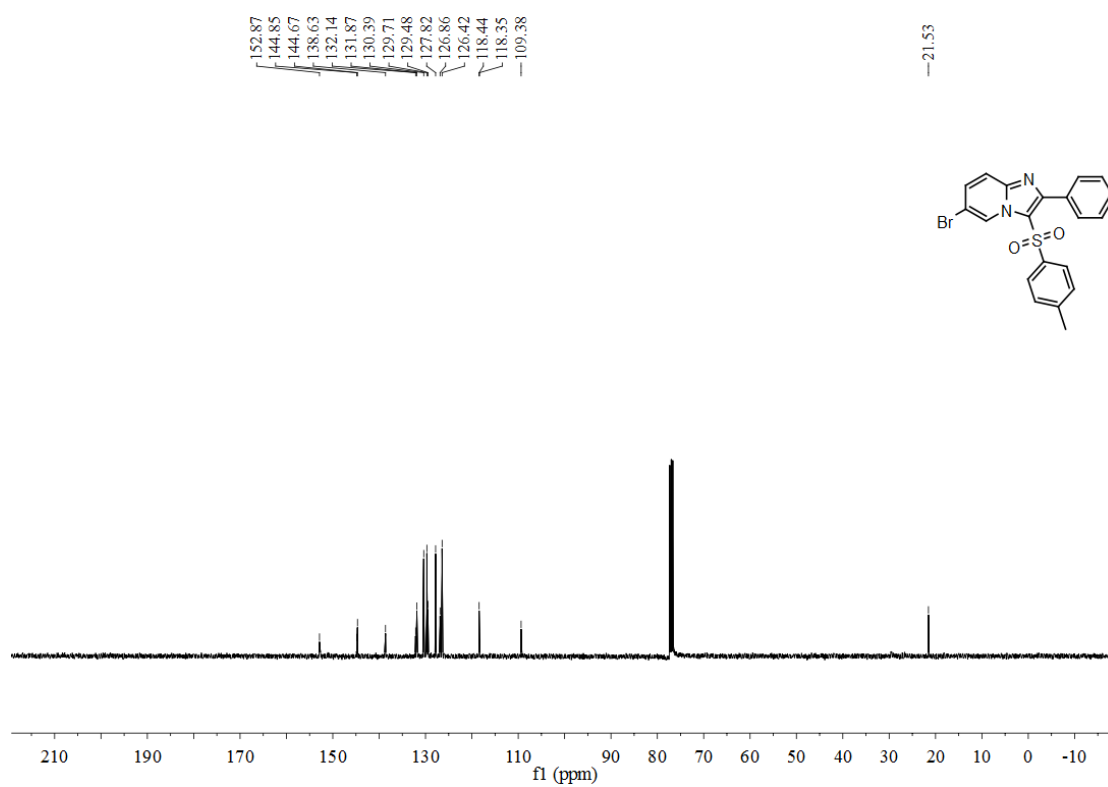

### <sup>1</sup>H NMR (400 MHz, CDCl<sub>3</sub>) spectrum of 3l

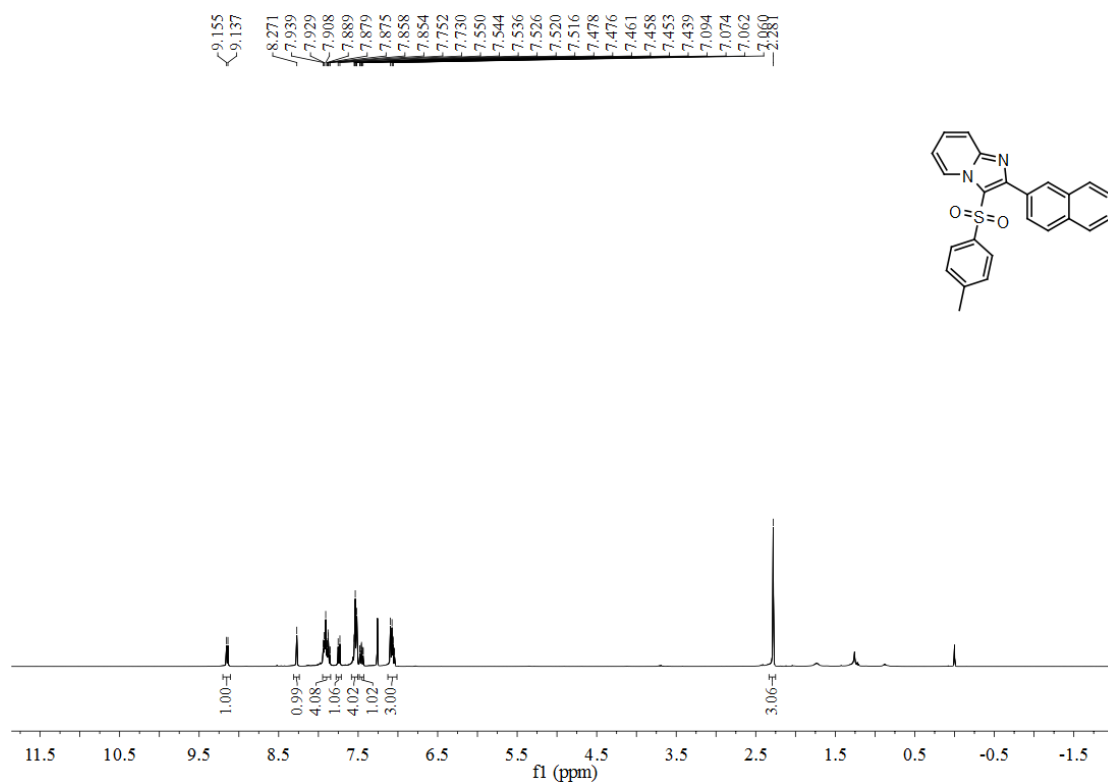

### <sup>13</sup>C NMR (101 MHz, CDCl<sub>3</sub>) spectrum of 3l

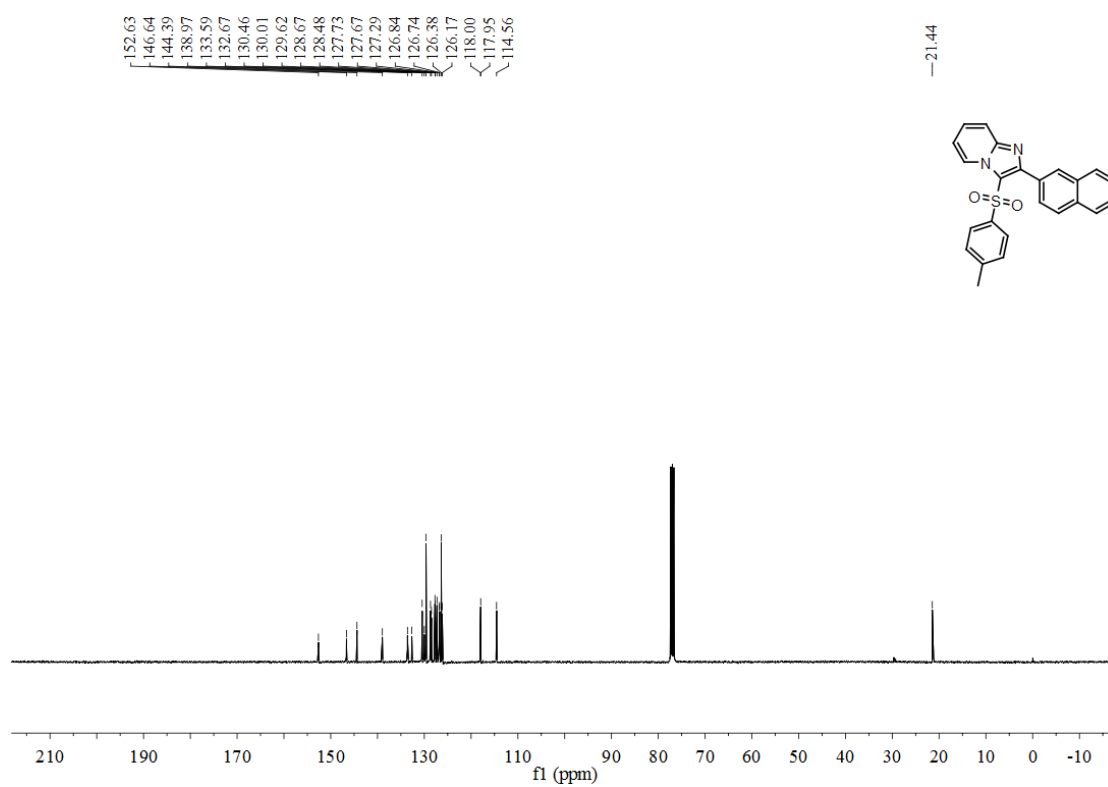

### $^1\text{H}$ NMR (400 MHz, $\text{CDCl}_3$ ) spectrum of 3m

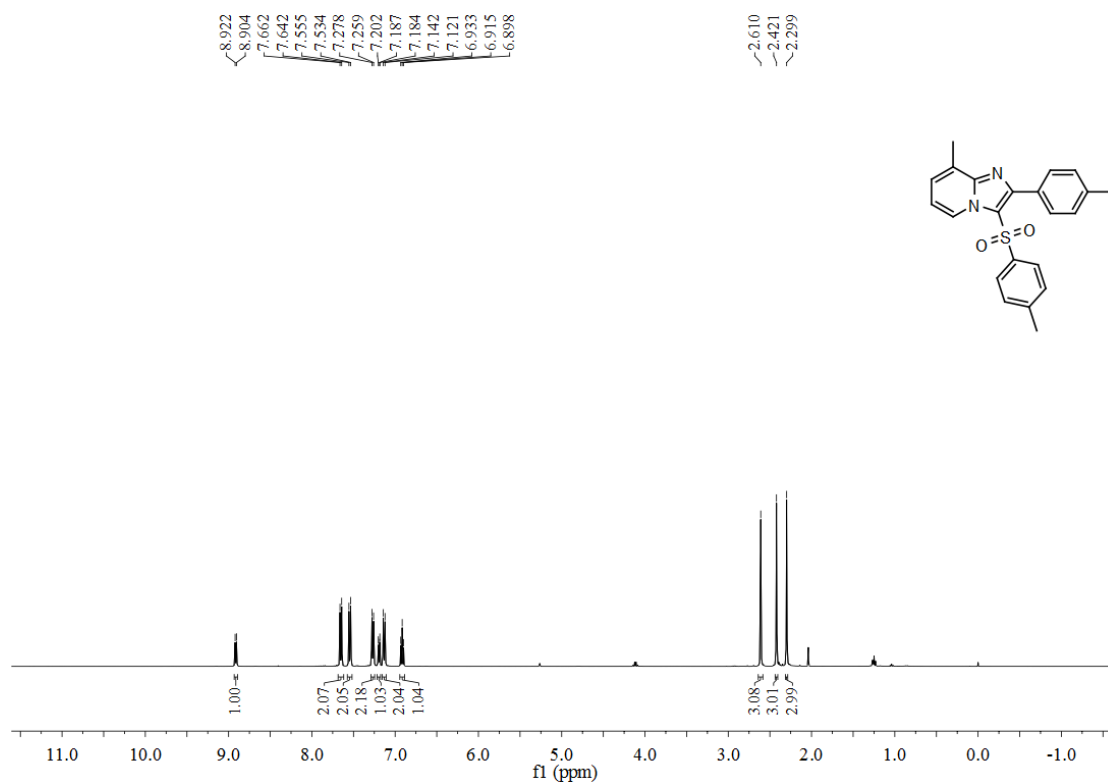

### $^{13}\text{C}$ NMR (101 MHz, $\text{CDCl}_3$ ) spectrum of 3m

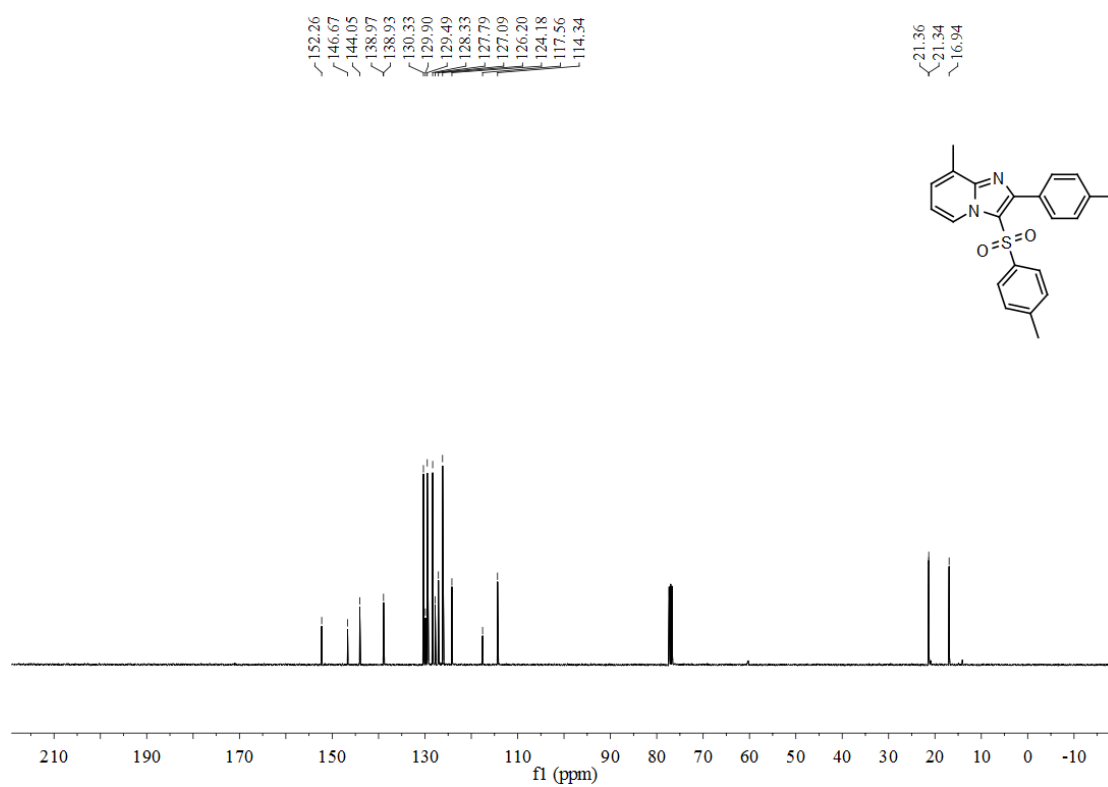

### <sup>1</sup>H NMR (400 MHz, CDCl<sub>3</sub>) spectrum of 3n

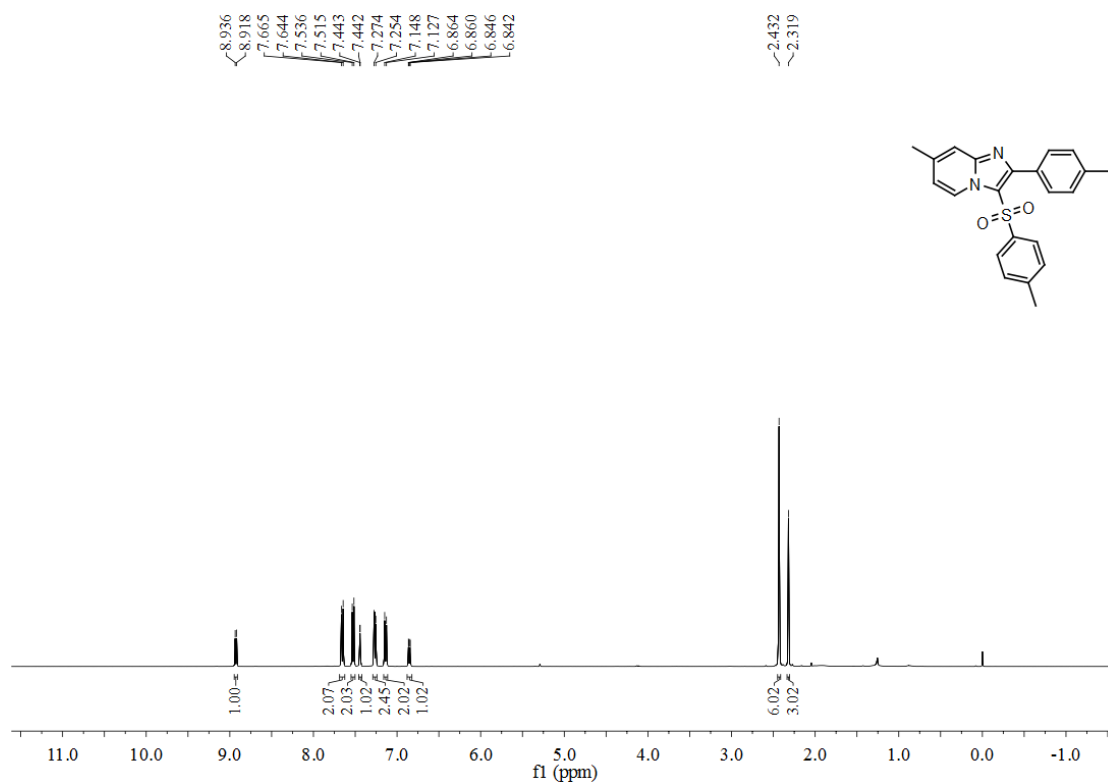

### <sup>13</sup>C NMR (101 MHz, CDCl<sub>3</sub>) spectrum of 3n

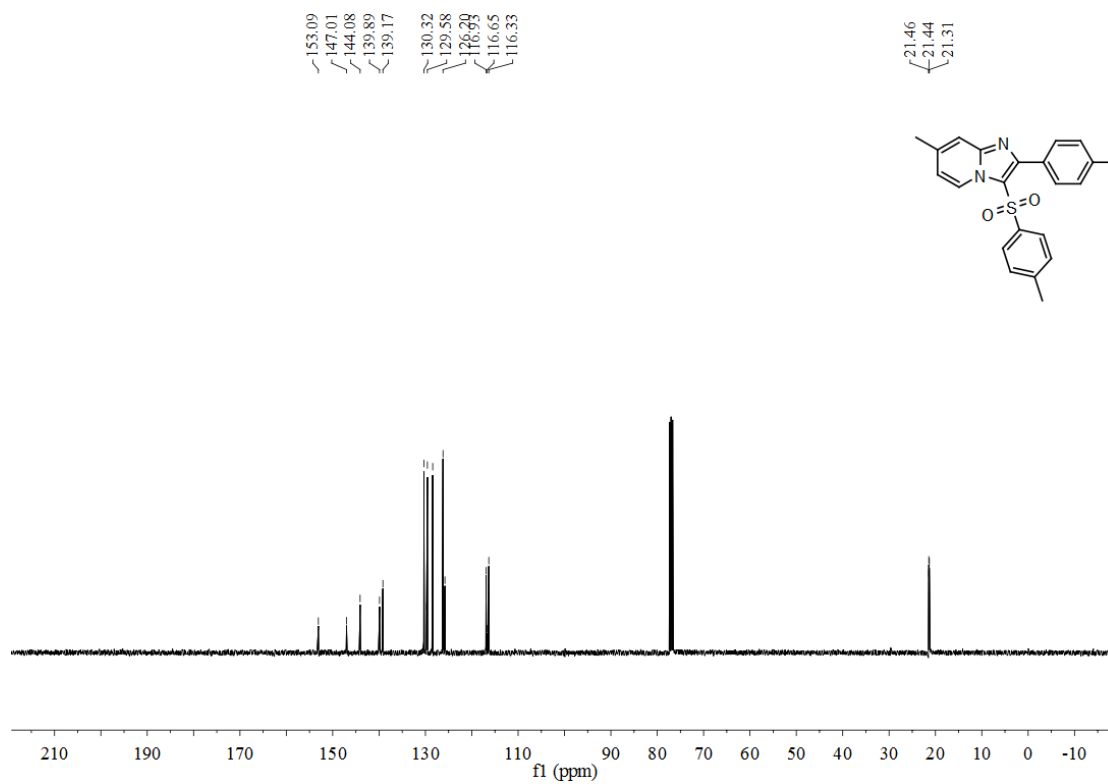

### <sup>1</sup>H NMR (400 MHz, CDCl<sub>3</sub>) spectrum of 3o

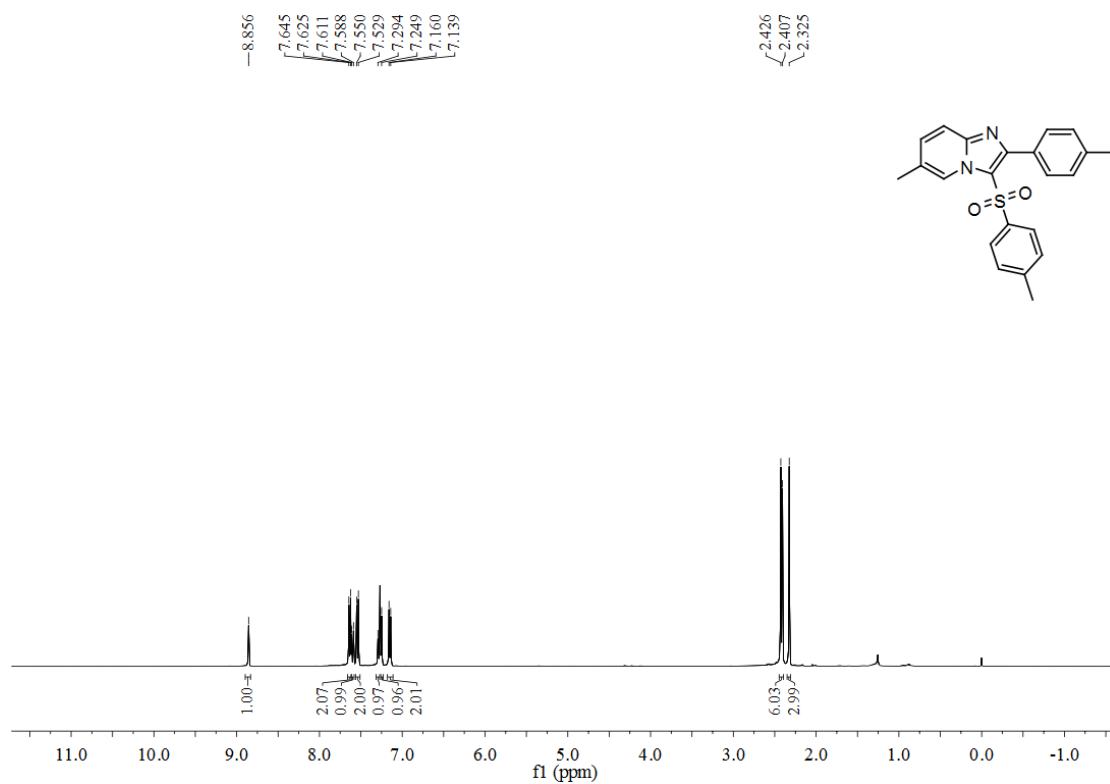

### <sup>13</sup>C NMR (101 MHz, CDCl<sub>3</sub>) spectrum of 3o

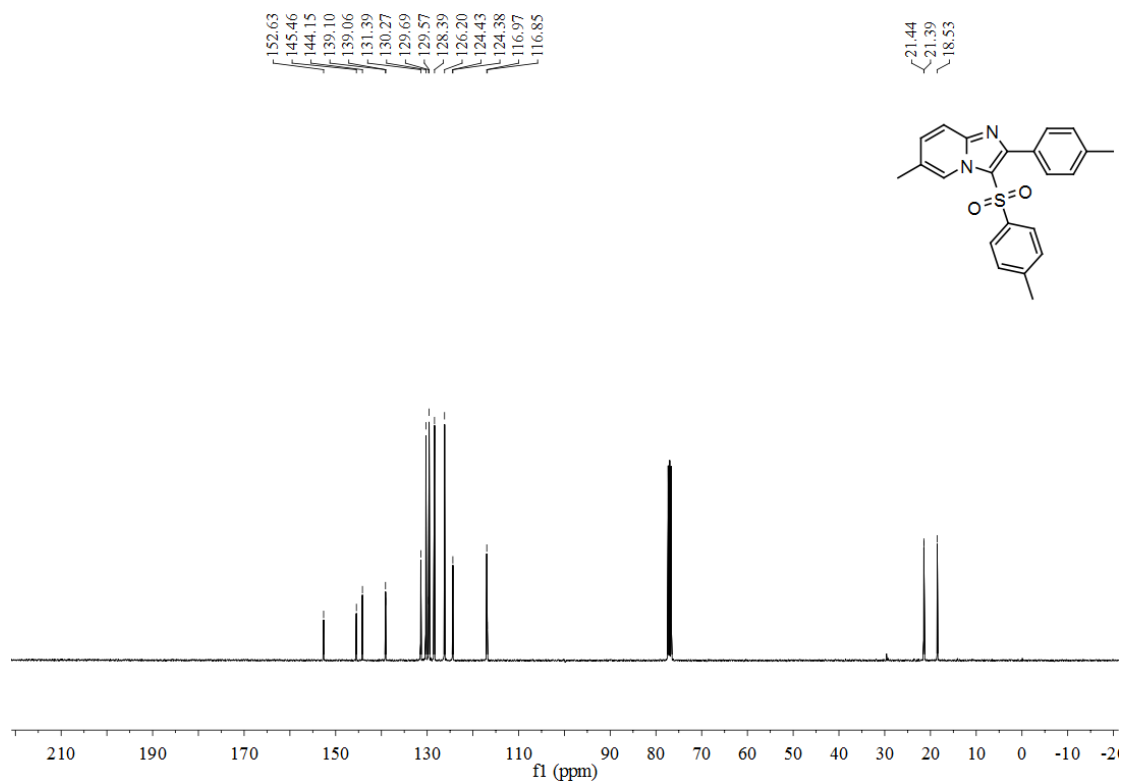

**<sup>1</sup>H NMR (400 MHz, CDCl<sub>3</sub>) spectrum of 4a**

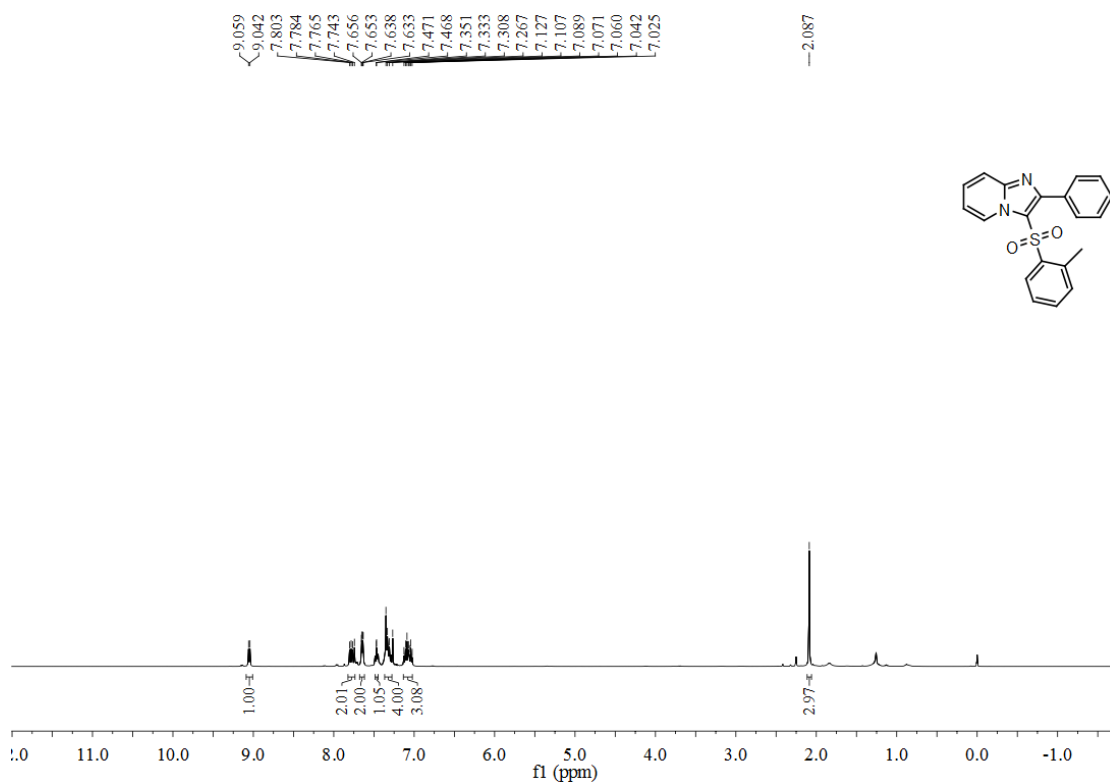

**<sup>13</sup>C NMR (101 MHz, CDCl<sub>3</sub>) spectrum of 4a**

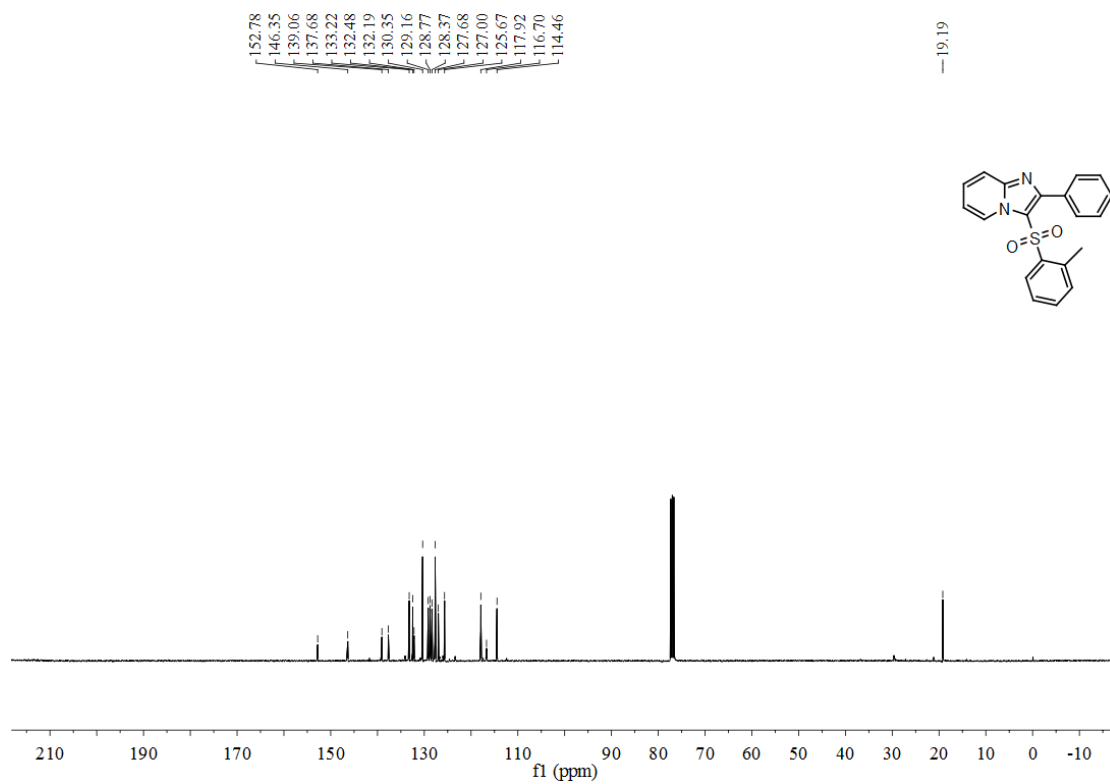



### <sup>1</sup>H NMR (400 MHz, CDCl<sub>3</sub>) spectrum of 4b

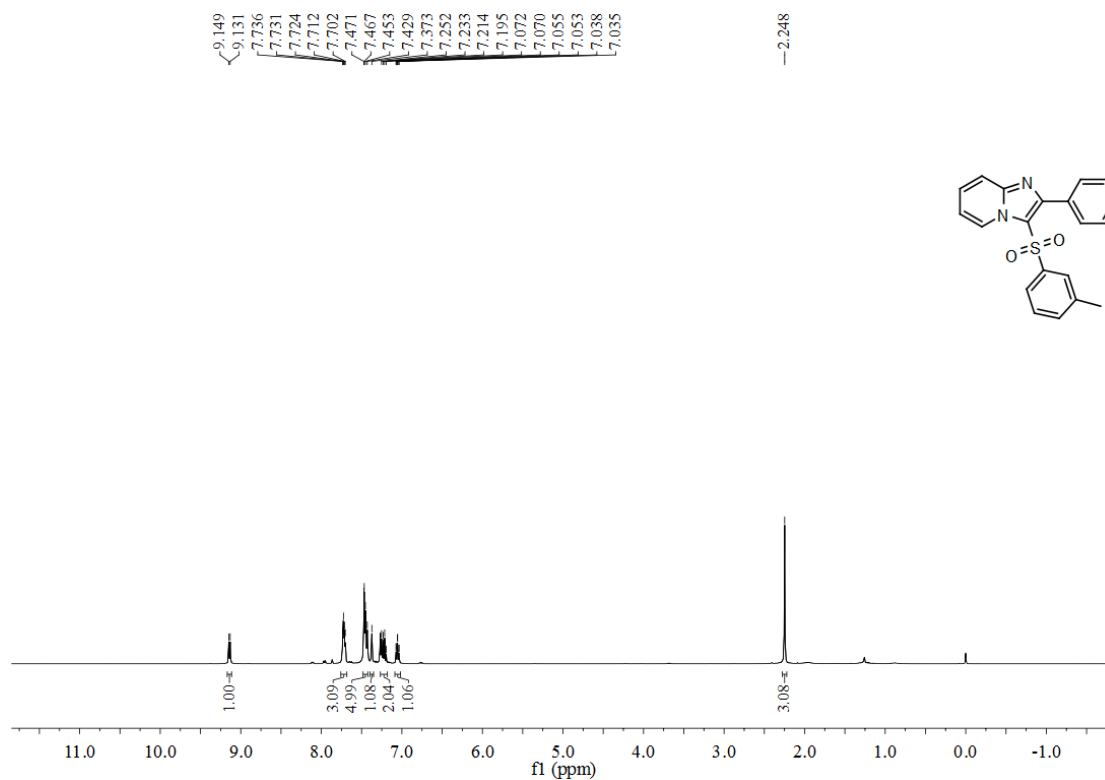

### <sup>13</sup>C NMR (101 MHz, CDCl<sub>3</sub>) spectrum of 4b

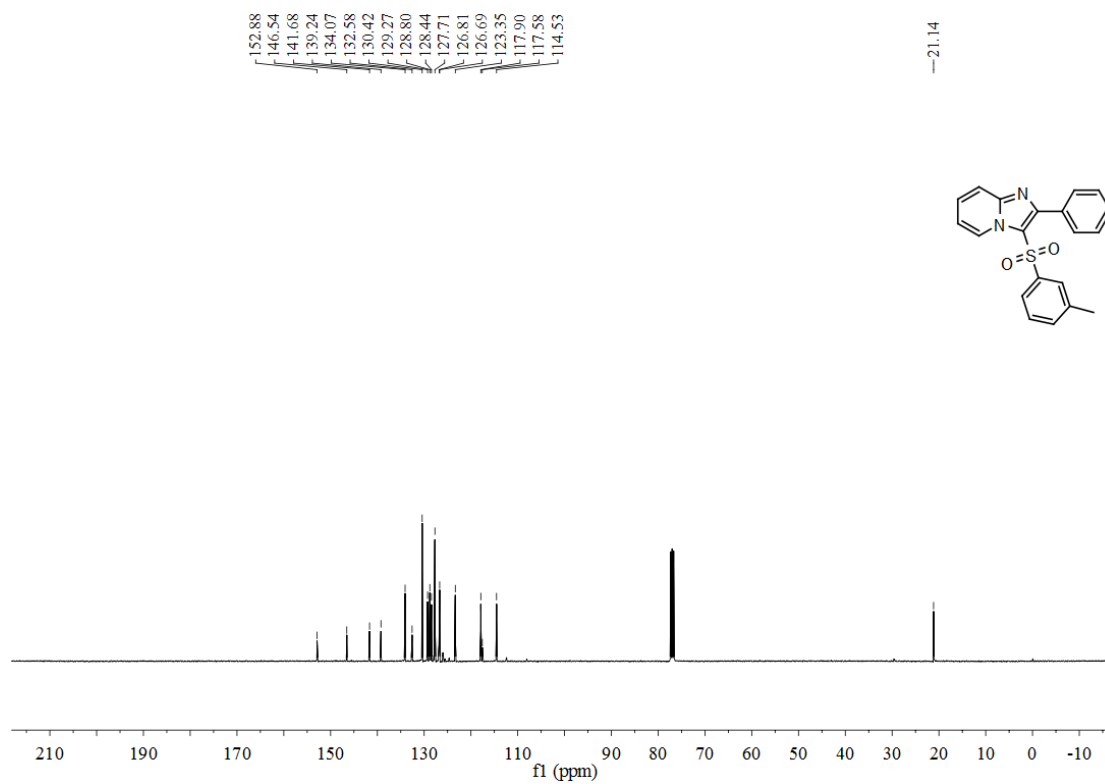

### <sup>1</sup>H NMR (400 MHz, CDCl<sub>3</sub>) spectrum of 4c

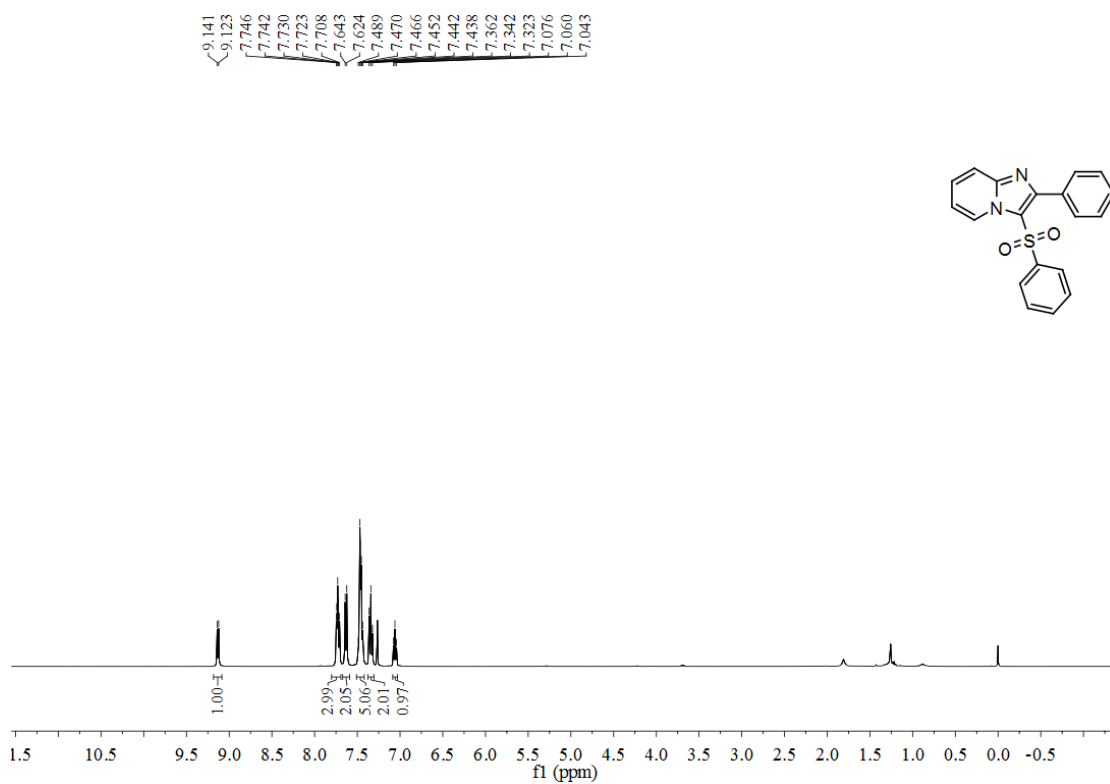

### <sup>13</sup>C NMR (101 MHz, CDCl<sub>3</sub>) spectrum of 4c

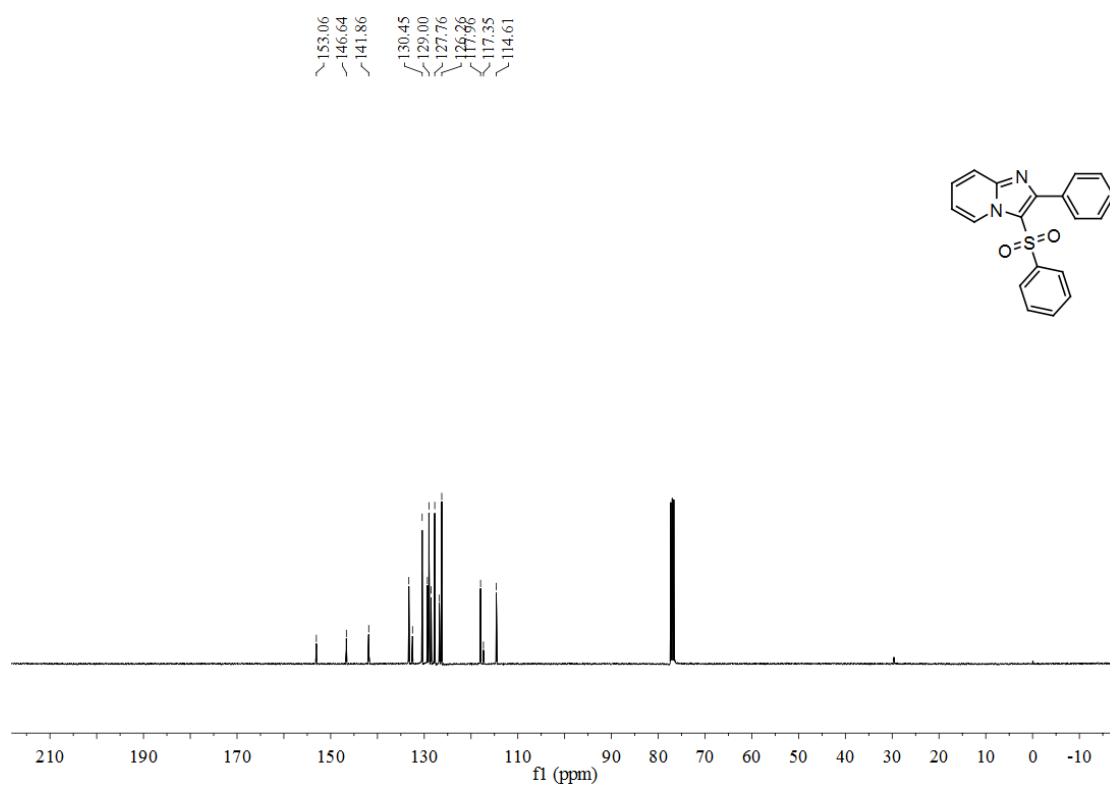

### <sup>1</sup>H NMR (400 MHz, CDCl<sub>3</sub>) spectrum of 4d

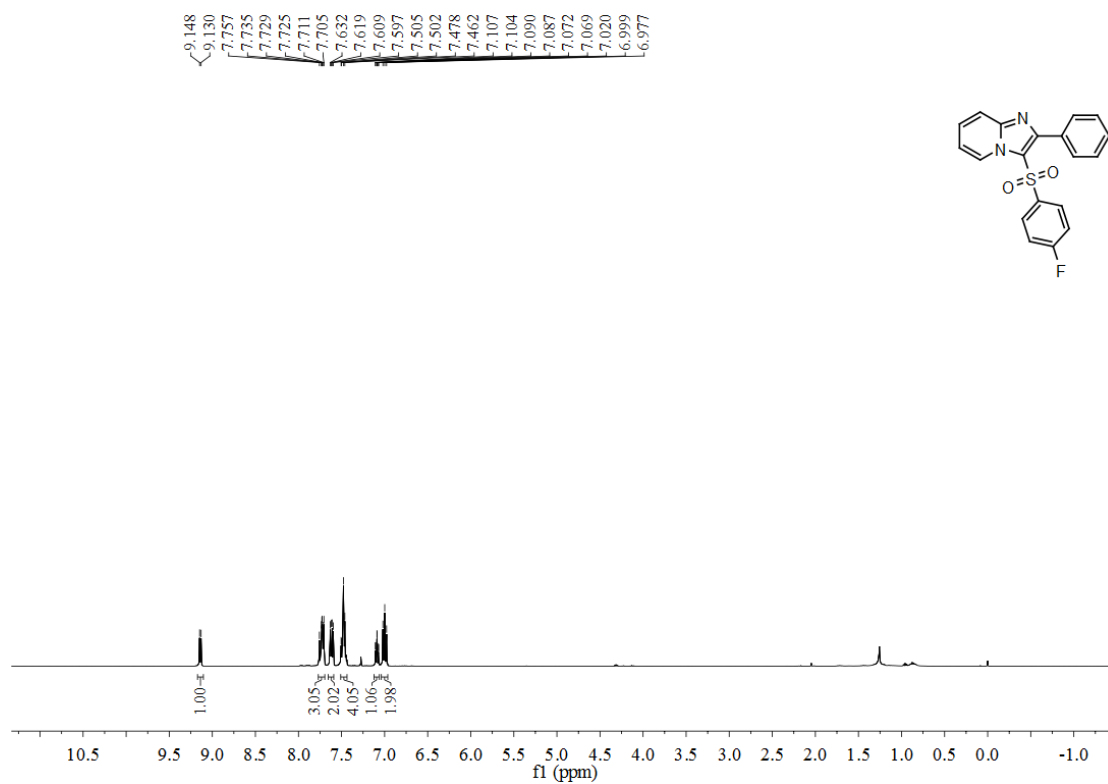

### <sup>13</sup>C NMR (101 MHz, CDCl<sub>3</sub>) spectrum of 4d

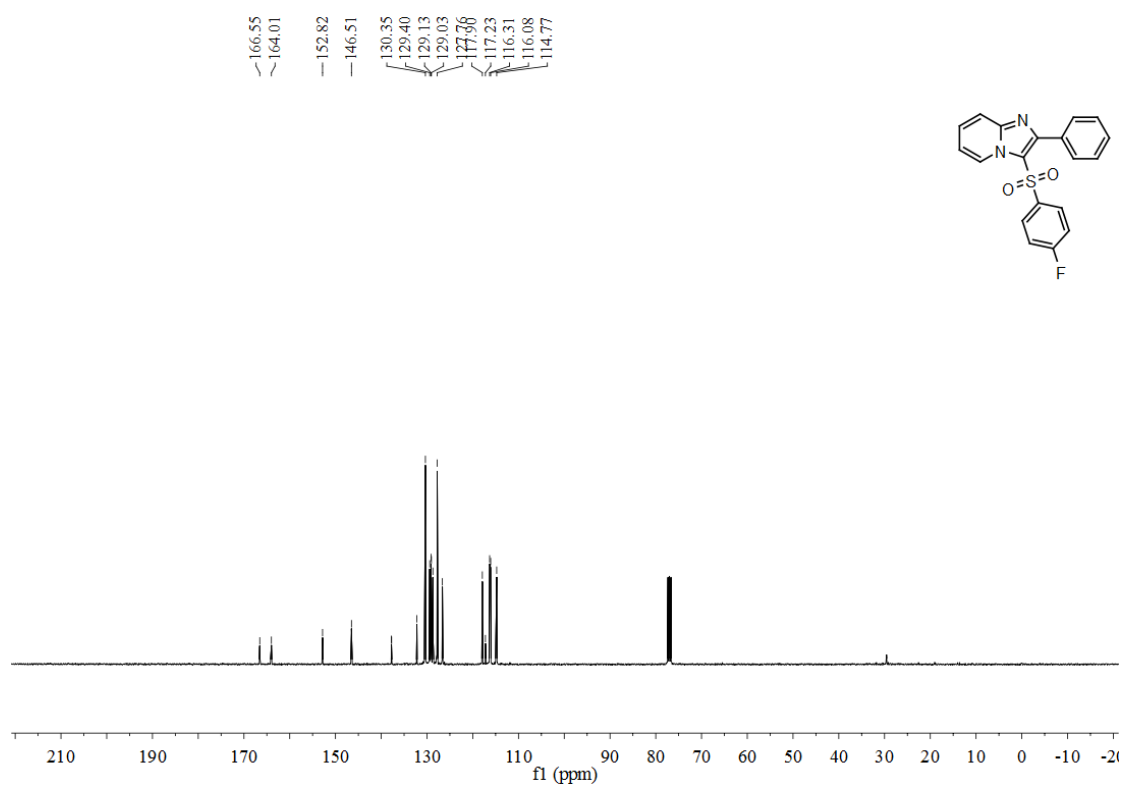

**<sup>19</sup>F NMR (376 MHz, CDCl<sub>3</sub>) spectrum of 4d**

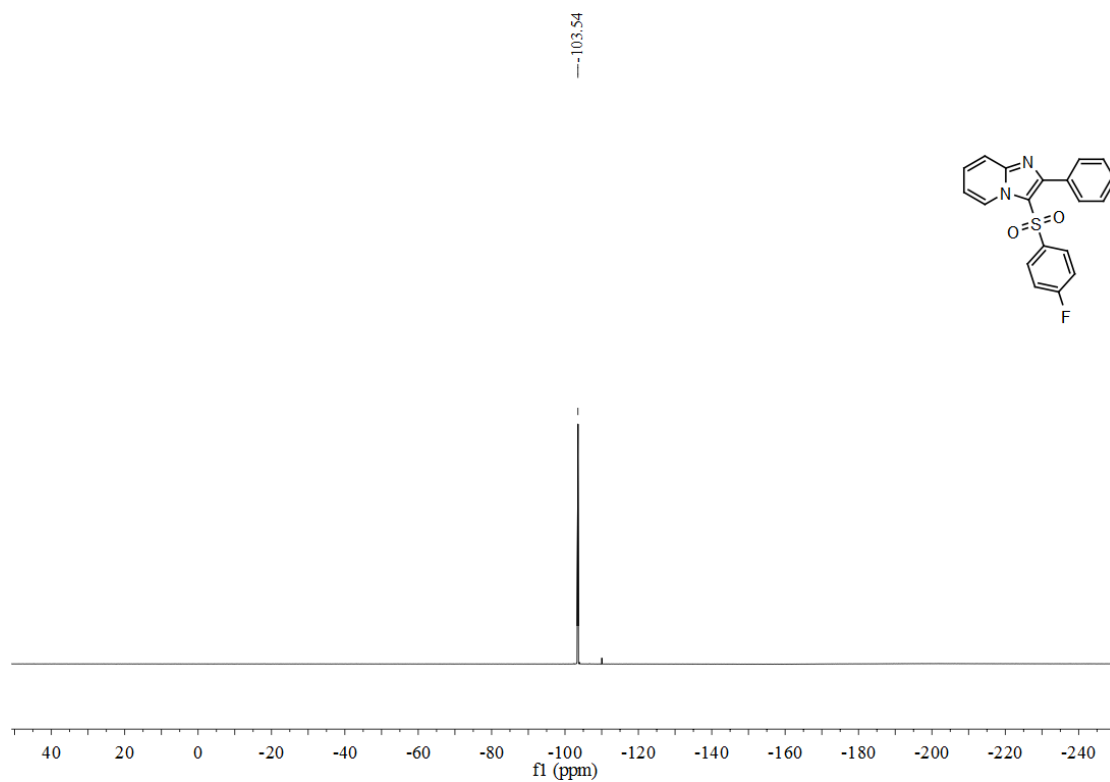

**<sup>1</sup>H NMR (400 MHz, CDCl<sub>3</sub>) spectrum of 4e**

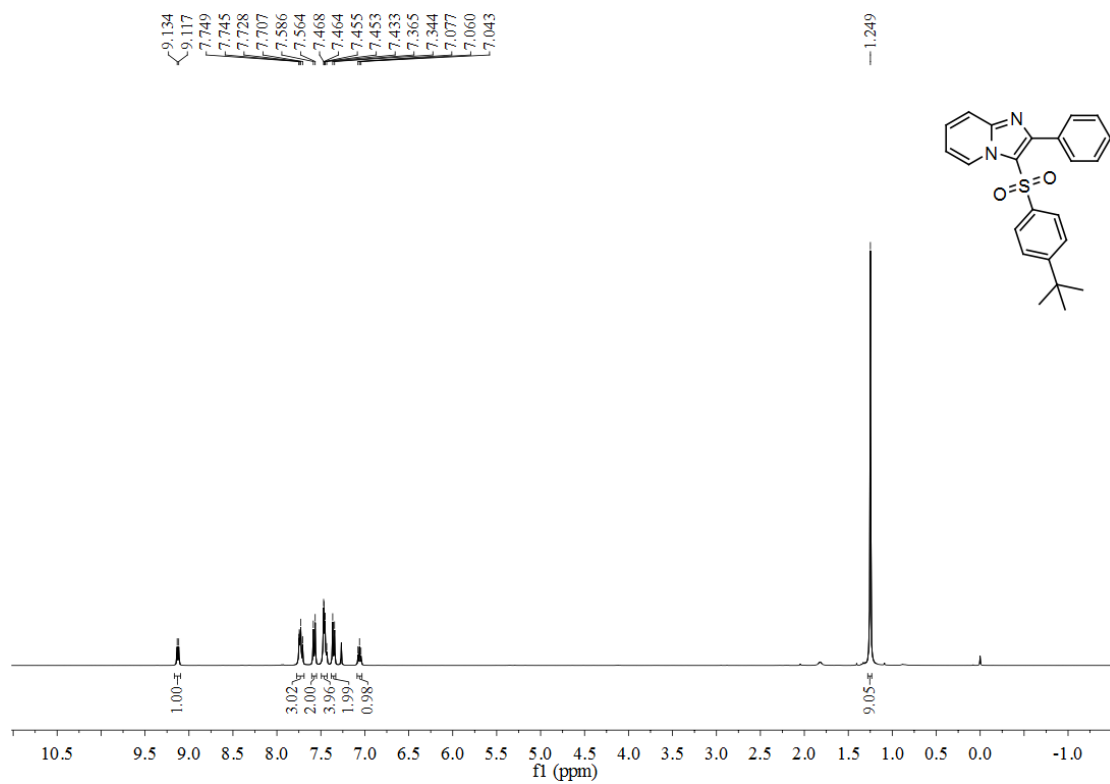

**<sup>13</sup>C NMR (101 MHz, CDCl<sub>3</sub>) spectrum of 4e**

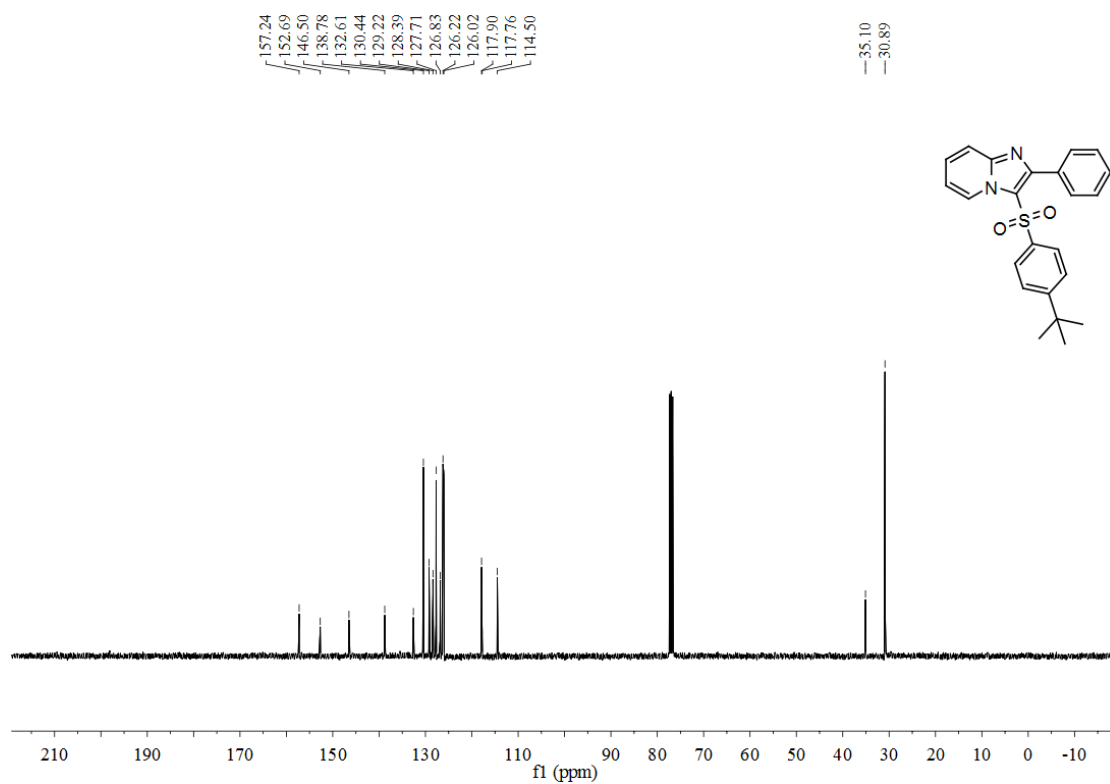

**<sup>1</sup>H NMR (400 MHz, CDCl<sub>3</sub>) spectrum of 4f**

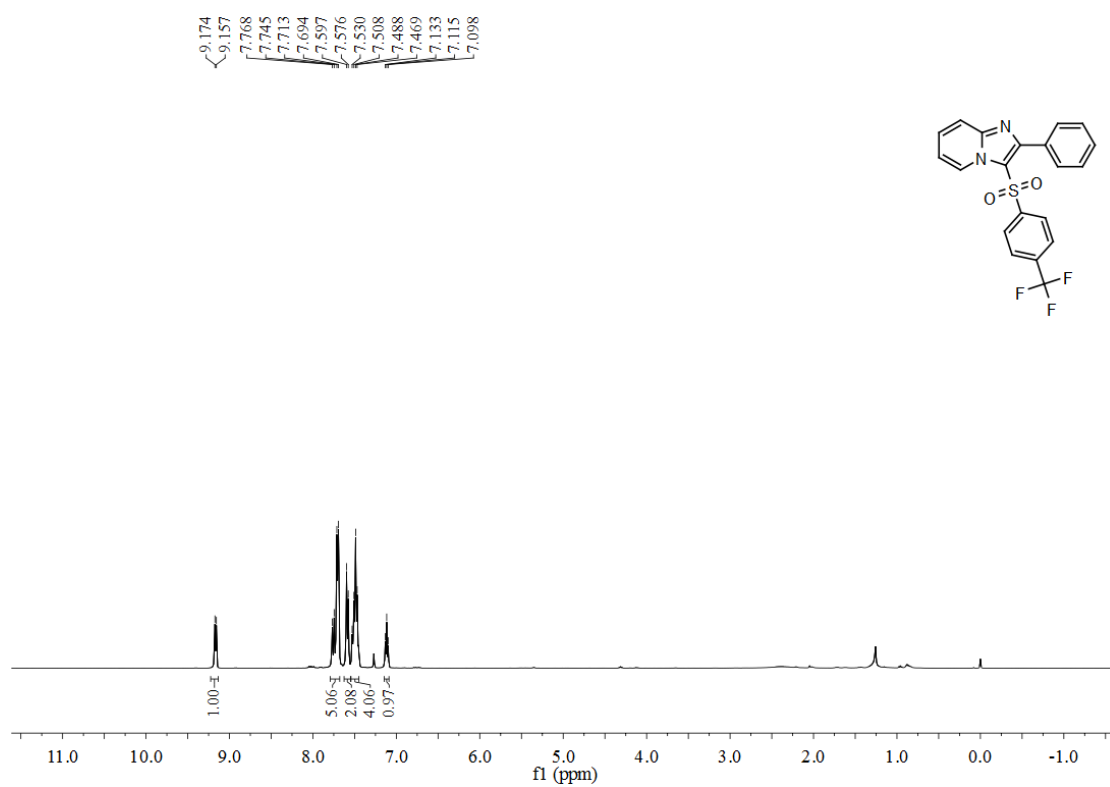

**<sup>13</sup>C NMR (101 MHz, CDCl<sub>3</sub>) spectrum of 4f**

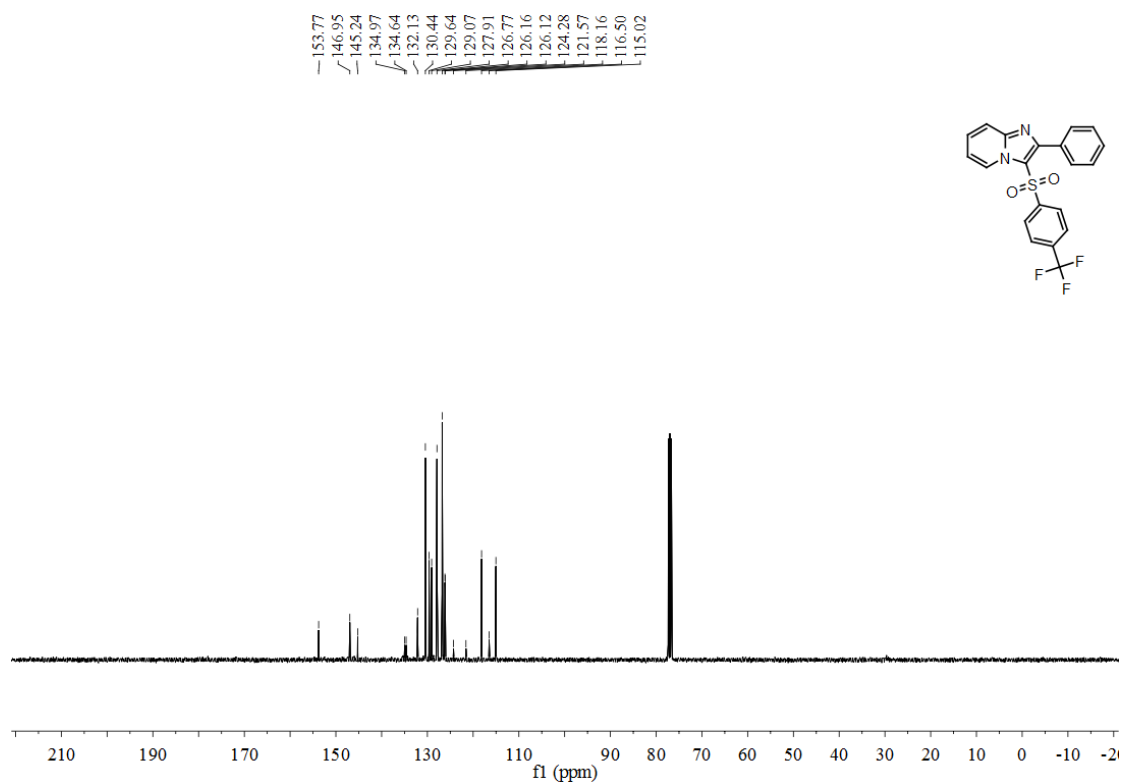

**<sup>19</sup>F NMR (376 MHz, CDCl<sub>3</sub>) spectrum of 4f**

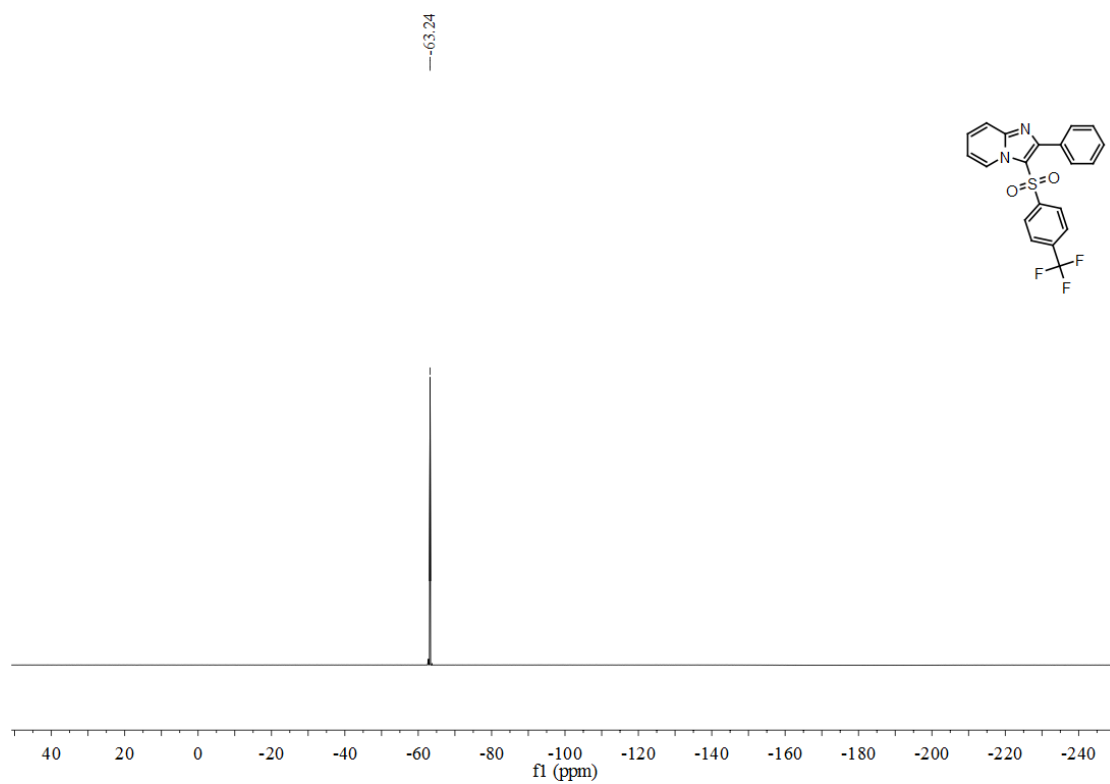

**<sup>1</sup>H NMR (400 MHz, CDCl<sub>3</sub>) spectrum of 4g**

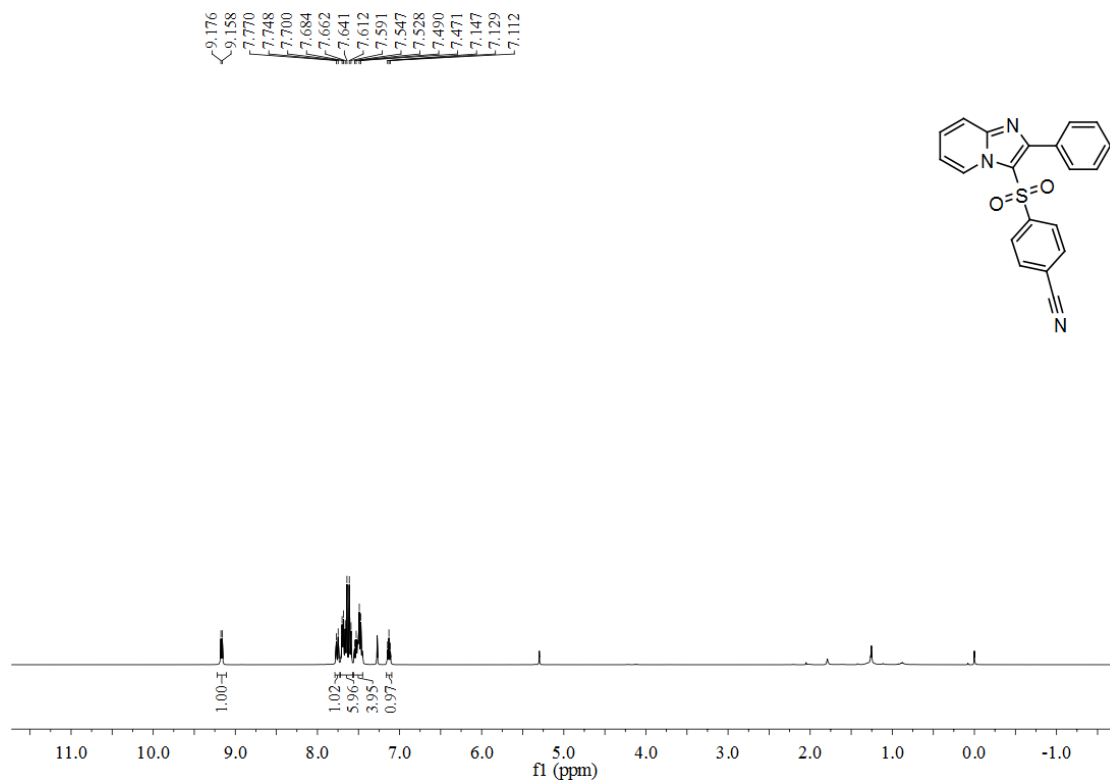

**<sup>13</sup>C NMR (101 MHz, CDCl<sub>3</sub>) spectrum of 4g**

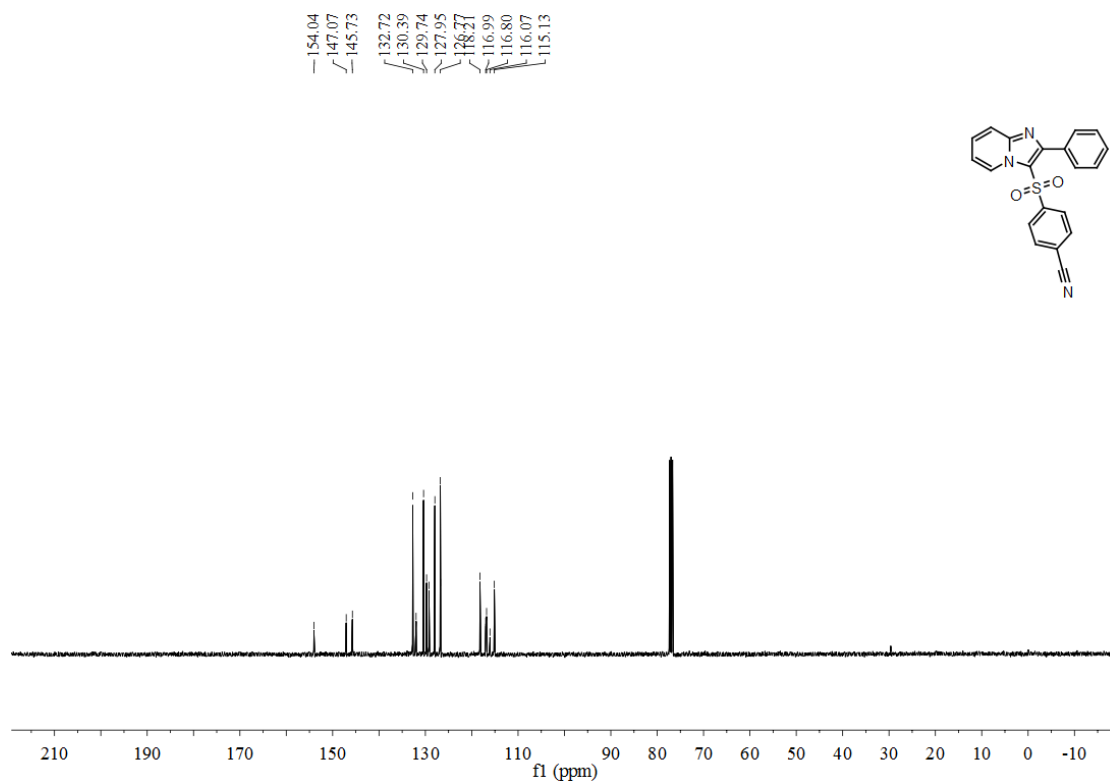

### <sup>1</sup>H NMR (400 MHz, DMSO-D<sub>6</sub>) spectrum of 4h

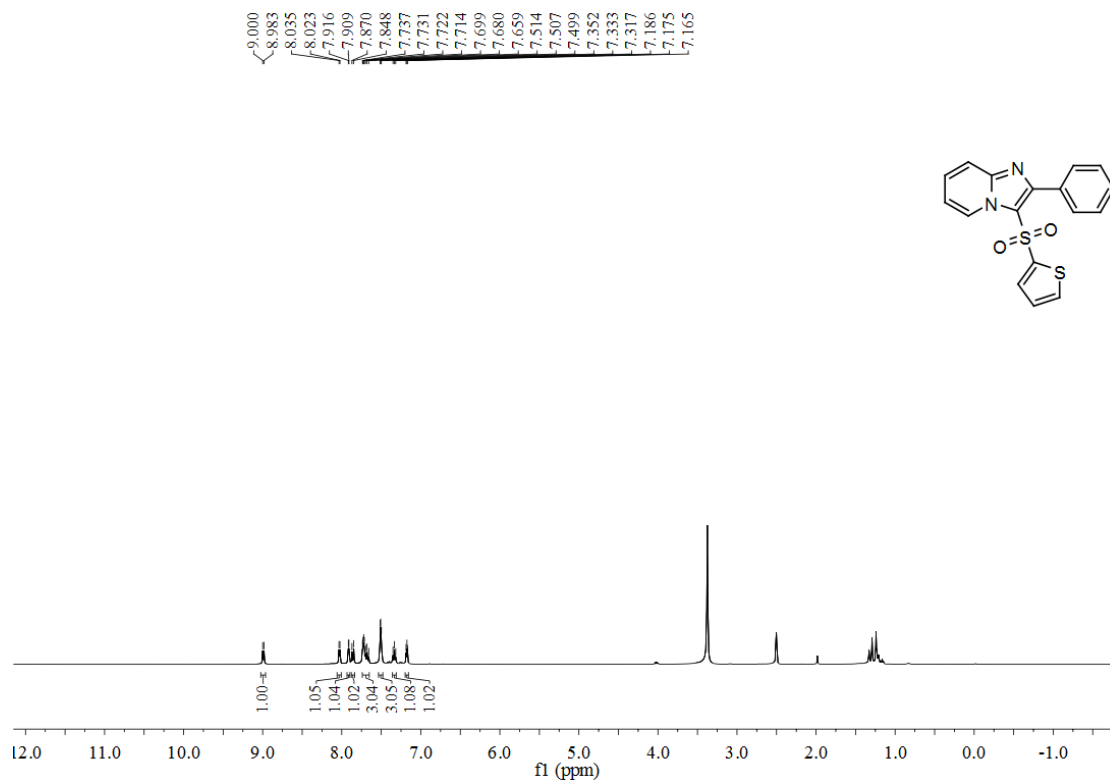

### <sup>13</sup>C NMR (101 MHz, DMSO-D<sub>6</sub>) spectrum of 4h

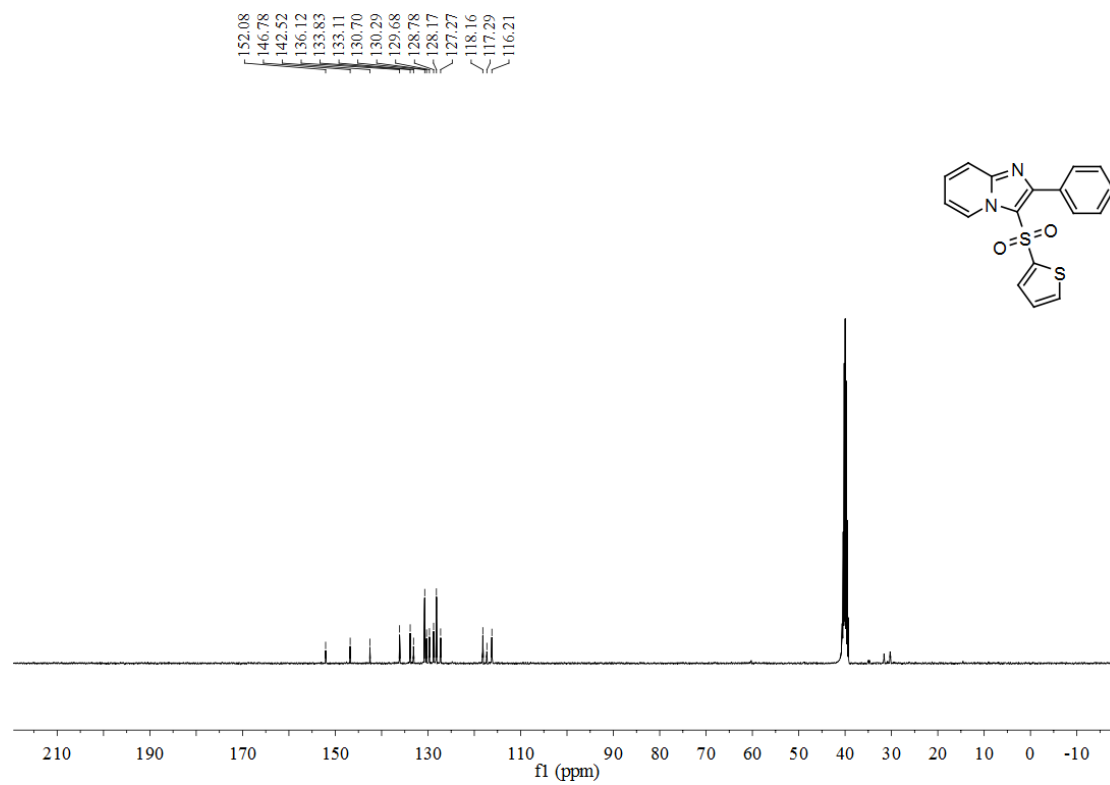

Supplement: d1qo00348h1.pdf [file d1qo00348h1.pdf]
